1 **Full Title:**

2  
3 **Synthetic Heparan Sulfate Mimetic Pixatimod (PG545) Potently Inhibits SARS-CoV-2 By**  
4 **Disrupting The Spike-ACE2 interaction**

5  
6 **Short title:** Heparan Sulfate Mimetic Pixatimod Potently Inhibits SARS-CoV-2

7  
8 **Authors**

9 Scott E. Guimond<sup>1,†</sup>, Courtney J. Mycroft-West<sup>1,†</sup>, Neha S. Gandhi<sup>2,†</sup>, Julia A. Tree<sup>3,†</sup>, Thuy T Le<sup>4,†</sup>,  
10 C. Mirella Spalluto<sup>5,†</sup>, Maria V. Humbert<sup>5</sup>, Karen R. Buttigieg<sup>3</sup>, Naomi Coombes<sup>3</sup>, Michael J.  
11 Elmore<sup>3</sup>, Kristina Nyström<sup>6</sup>, Joanna Said<sup>6</sup>, Yin Xiang Setoh<sup>7,8</sup>, Alberto A. Amarilla<sup>7,8</sup>, Naphak  
12 Modhiran<sup>7,8</sup>, Julian D.J. Sng<sup>7,8</sup>, Mohit Chhabra<sup>7,8</sup>, Paul R. Young<sup>7,8</sup>, Marcelo A. Lima<sup>1</sup>, Edwin  
13 A.Yates<sup>9</sup>, Richard Karlsson<sup>10</sup>, Rebecca L. Miller<sup>10</sup>, Yen-Hsi Chen<sup>10</sup>, Ieva Bagdonaite<sup>10</sup>, Zhang  
14 Yang<sup>10</sup>, James Stewart<sup>11</sup>, Edward Hammond<sup>12</sup>, Keith Dredge<sup>12</sup>, Tom M.A. Wilkinson<sup>5,13</sup>, Daniel  
15 Watterson<sup>7,8,‡</sup>, Alexander A. Khromykh<sup>7,8,‡</sup>, Andreas Suhrbier<sup>4,‡</sup>, Miles W. Carroll<sup>3,‡</sup>, Edward  
16 Trybala<sup>6,‡</sup>, Tomas Bergström<sup>6,‡</sup>, Vito Ferro<sup>7,8,‡</sup>, Mark A. Skidmore<sup>1,‡</sup> and Jeremy E. Turnbull<sup>9,10,‡\*</sup>

17  
18 <sup>1</sup>Molecular & Structural Biosciences, School of Life Sciences, Keele University, Newcastle-Under-  
19 Lyme, Staffordshire, ST5 5BG, UK.

20 <sup>2</sup>School of Chemistry and Physics, Centre for Genomics and Personalized Health, Queensland  
21 University of Technology, 2 George Street, Brisbane, QLD 4000, Australia.

22 <sup>3</sup>National Infection Service, Public Health England, Porton Down, Salisbury, Wiltshire, England,  
23 UK, SP5 3NU.

24 <sup>4</sup>Queensland Institute of Medical Research Berghofer Medical Research Institute, Brisbane,  
25 Queensland 4029, Australia

26 <sup>5</sup>School of Clinical and Experimental Sciences, University of Southampton Faculty of Medicine,  
27 Southampton, UK

28 <sup>6</sup>Department of Infectious Diseases, Institute of Biomedicine, University of Gothenburg,  
29 Guldhedsgatan 10B, S-413 46 Goteborg, Sweden

30 <sup>7</sup>School of Chemistry and Molecular Biosciences, University of Queensland, Brisbane, QLD 4072,  
31 Australia.

32 <sup>8</sup>Australian Infectious Diseases Research Centre, University of Queensland, Brisbane, QLD 4072,  
33 Australia.

34 <sup>9</sup>Department of Biochemistry and Systems Biology, Institute of Systems, Molecular and Integrative  
35 Biology, University of Liverpool, Liverpool, L69 7ZB, UK.

36 <sup>10</sup>Copenhagen Center for Glycomics, Department of Cellular & Molecular Medicine, University of  
37 Copenhagen, Copenhagen N 2200, Denmark.

38 <sup>11</sup>Dept of Infection Biology & Microbiomes, University of Liverpool, Liverpool, L69 7ZB, UK

39 <sup>12</sup>Zucero Therapeutics Ltd, 1 Westlink Court, Brisbane, Queensland 4076, Australia.

40 <sup>13</sup> NIHR Southampton Biomedical Research Centre, University Hospital Southampton, UK

43 †These authors contributed equally

44 ‡Equal senior authors

45 \*Corresponding author: [j.turnbull@liverpool.ac.uk](mailto:j.turnbull@liverpool.ac.uk); +44 (0)151 795 4427

46

## 47 **Summary**

48

49 Heparan sulfate (HS) is a cell surface polysaccharide recently identified as a co-receptor with the  
50 ACE2 protein for recognition of the S1 spike protein on SARS-CoV-2 virus, providing a tractable  
51 new target for therapeutic intervention. Clinically-used heparins demonstrate inhibitory activity,  
52 but world supplies are limited, necessitating alternative solutions. Synthetic HS mimetic pixatimod  
53 is a drug candidate for cancer with immunomodulatory and heparanase-inhibiting properties. Here  
54 we show that pixatimod binds to and destabilizes the SARS-CoV-2 spike protein receptor binding  
55 domain (S1-RBD), and directly inhibits its binding to human ACE2, consistent with molecular  
56 modelling identification of multiple molecular contacts and overlapping pixatimod and ACE2  
57 binding sites. Assays with multiple clinical isolates of live SARS-CoV-2 virus show that pixatimod  
58 potently inhibits infection of monkey Vero E6 and human bronchial epithelial cells at  
59 concentrations within its safe therapeutic dose range. Furthermore, in a K18-hACE2 mouse model  
60 pixatimod demonstrates that pixatimod markedly attenuates SARS-CoV-2 viral titer and COVID-  
61 19-like symptoms. This demonstration of potent anti-SARS-CoV-2 activity establishes proof-of-  
62 concept for targeting the HS-Spike protein-ACE2 axis with synthetic HS mimetics. Together with  
63 other known activities of pixatimod our data provides a strong rationale for its clinical investigation  
64 as a potential multimodal therapeutic to address the COVID-19 pandemic.

65

66 *199 words*

67

68

## 69 **Introduction**

70

71 The coronavirus disease 2019 (COVID-19) pandemic caused by the severe acute respiratory  
72 syndrome coronavirus 2 (SARS-CoV-2) has according to the World Health Organisation recently  
73 surpassed 110 million cases and 2.4 million deaths world-wide. Although vaccines against COVID-  
74 19 are currently being developed and deployed, given the severe pathophysiology induced by  
75 SARS-CoV-2 (1), there is a clear need for therapeutic alternatives to alleviate and stop the COVID-  
76 19 epidemic that complement vaccination campaigns. Heparan sulfate (HS) is a highly sulfated  
77 glycosaminoglycan found on the surface of most mammalian cells which is used by many viruses  
78 as an entry receptor or co-receptor (2), including coronaviruses (3). Various compounds that mimic  
79 cellular HS such as clinically-used heparins have been investigated and have been shown to block  
80 infectivity and cell-to-cell spread in a multitude of different viruses, including SARS-associated  
81 coronavirus strain HSR1 (4). The glycosylated spike (S) protein of SARS-CoV-2 mediates host cell  
82 infection via binding to a receptor protein, angiotensin-converting enzyme 2 (ACE2) (5). Analysis  
83 of the sequence and experimentally determined structures of the S protein reveals that the receptor  
84 binding domain (RBD) of the S1 subunit contains a HS binding site. Recent studies have clearly  
85 demonstrated binding of heparin and HS to S1 RBD (6-9), including induction of significant  
86 conformational change in the S1 RBD structure (6), and also revealed that HS is a co-receptor with  
87 ACE2 for SARS-CoV-2 (10). Collectively these data strongly suggest that blocking these

88 interactions with heparins and HS mimetics has potential as an effective strategy for COVID-19  
89 therapy. Although heparins have major potential for repurposing for such applications, limitations  
90 in the global supply of natural product heparins will greatly restrict its availability (11), highlighting  
91 an urgent need to find synthetic alternatives.

92  
93 Pixatimod (PG545) is a clinical-stage HS mimetic with potent anti-cancer (12,13), and anti-  
94 inflammatory properties (14). However, significant antiviral and virucidal activity for pixatimod  
95 has also been reported against a number of viruses that use HS as an entry receptor with  $EC_{50}$ 's  
96 ranging from 0.06 to 14  $\mu\text{g}/\text{mL}$ . This includes HSV-2 (15), HIV (16), RSV (17), Ross River,  
97 Barmah Forest, Asian CHIK and chikungunya viruses (18), and Dengue virus (19). *In vivo* efficacy  
98 has been confirmed in a prophylactic mouse HSV-2 genital infection model (15), a prophylactic  
99 Ross River virus mouse model (18) and a therapeutic Dengue virus mouse model (19). Pixatimod  
100 has been evaluated in a Phase Ia clinical trial in patients with advanced solid tumours where it  
101 demonstrated a tolerable safety profile and some evidence of disease control (13). It has been safely  
102 administered to over 80 cancer patients in Phase I studies as a monotherapy or in combination with  
103 nivolumab (NCT02042781 and ACTRN12617001573347), prompting us to examine its anti-viral  
104 activity against SARS-CoV-2.

105  
106 Here we provide evidence of a direct and destabilizing interaction of pixatimod with the S1 spike  
107 protein RBD, supported by molecular modelling data. Additionally, pixatimod was able to inhibit  
108 the interaction of S1-RBD with ACE2 and also Vero cells which are known to express the ACE2  
109 receptor, indicating a direct mechanism of action. We established that pixatimod is a potent  
110 inhibitor of attachment and invasion of Vero cells and human bronchial epithelial cells by multiple  
111 clinical isolates of live SARS-CoV-2 virus, and reduces its cytopathic effect, at concentrations  
112 within the known therapeutic range of this drug. Finally, we observed marked attenuation of SARS-  
113 CoV-2 viral RNA load and COVID-19-like symptoms in the K18-hACE2 mouse model of  
114 infection. Our data demonstrate that synthetic HS mimetics can target the HS-Spike protein-ACE2  
115 axis to inhibit SARS-CoV-2 infection. They provide strong support for clinical investigation of the  
116 potential of pixatimod as a novel therapeutic intervention for prophylaxis and treatment of COVID-  
117 19, and have implications for wider applications against other HS-binding viruses and emerging  
118 global viral threats.

## 132 Results

### 134 Modelling of pixatimod-spike protein interactions

135 We initially used molecular dynamics (MD) simulations to map the potential binding sites of  
136 pixatimod (**Fig 1A**) on the S1 RBD surface (**Fig 1B**) of monomeric spike. A total of 24 unique  
137 residues of RBD are known to interact with ACE2 based on the X-ray structures (**Fig 1B**).  
138 Interestingly, a few of these residues (Tyr489, Phe456, Leu455, Ala475) are also predicted to be  
139 involved in binding to pixatimod. Amino acids making significant interactions with pixatimod were  
140 identified on the basis of their individual contributions to the total interaction energy, considering  
141 only the residues that contribute less than -1.0 kcal/mol. The decomposition approach was helpful  
142 for locating residues of the RBD domain such as Lys458, Ser459, Lys462 and Asn481 that  
143 transiently interact to form hydrogen bonds or ionic interactions with the sulfated tetrasaccharide  
144 moiety of pixatimod (**Fig 1D**). The free energy of binding is -10 kcal/mol, wherein van der Waals  
145 energies make the major favourable contribution to the total free energy. The cholesterol residue  
146 also formed stabilizing interactions with Tyr489, Phe456, Tyr473, Ala475, Gln474 and Leu455  
147 (**Fig 1E**). Furthermore, the standard deviation of backbone RMSD around residues Leu455-Pro491  
148 and the N-terminal of RBD (Thr333-Thr345) among the four repeated MD trajectories were  
149 approximately 2Å, indicating significant conformational change in the region. RMSF calculations  
150 of main-chain atoms showed significant atomic fluctuations ( $\geq 1.5$  Å) for Lys458, Asn460, Lys462,  
151 Arg466, Ser477 and Asn481 upon binding to the ligand pixatimod. These results indicate that a  
152 conformational change may be induced by binding of pixatimod to S1 RBD (**Fig 1C**).

153  
154 An alternate heparin binding site is reported around residues Arg403, Arg406, Arg408, Gln409,  
155 Lys417, Gln493, Gln498 (8). One of the replicates indicated a second binding mode wherein the  
156 tetrasaccharide of pixatimod was found to interact around this region (Supplementary Materials,  
157 **Fig S1**), however, the free energy of binding was  $> +13$  kcal/mol indicating much less favourable  
158 binding to this site. Overall, our modelling data strongly support the notion of direct binding of  
159 pixatimod via multiple amino acid contacts in S1 RBD, potentially resulting in induction of a  
160 conformational change and interference with binding to ACE2.

173

**A**

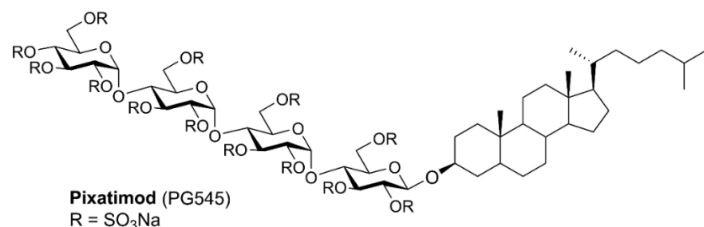

174

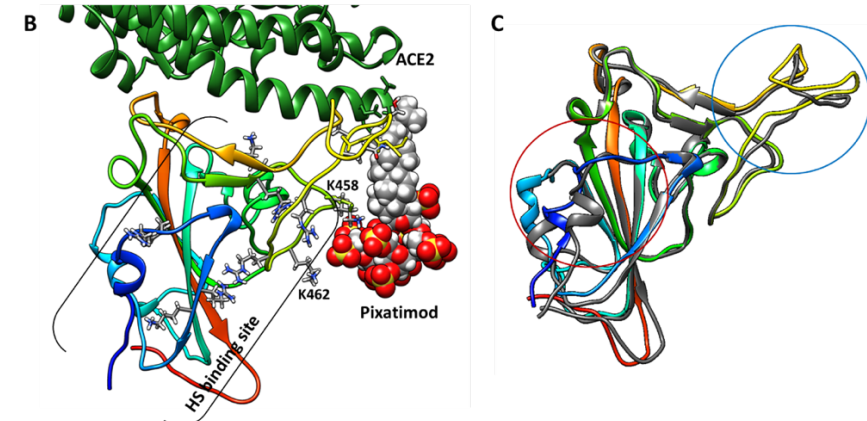

175

176

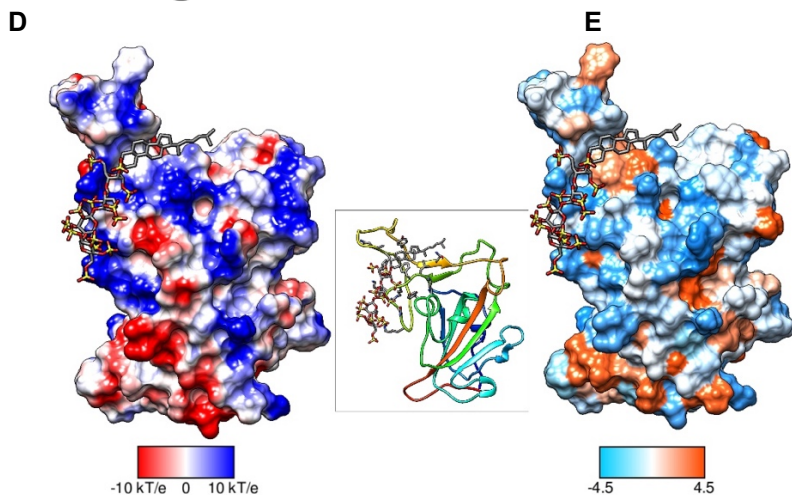

177

178

179

180

181

182

183

184

185

186

187

188

189

190

191

192

193

194

195

196

**Figure 1: Molecular dynamics modelling defines direct interactions of pixatimod with S1 RBD:** **A**, Structure of pixatimod. **B**, Model showing interactions of pixatimod with the RBD domain of spike protein. The sulfated tetrasaccharide partially occupies the HS/heparin binding site. The lipophilic tail of pixatimod wraps around the hydrophobic loop, thereby creating a steric clash with the helix of ACE2 protein (shown in inset-green ribbon). **C**, Superimposition of the X-ray structure (PDB: 6LZG) and one of the snapshots from MD simulations (ligand not shown) suggest conformational change around the loop region (blue circle) and the N-terminal helix as highlighted (red circle). **D**, coulombic surface and **E**, hydrophobic surface binding mode of pixatimod to S1 RBD. Both surfaces are oriented in the same direction as shown in the ribbon diagram of the protein in the middle. The sulfated tetrasaccharide interacts with the basic regions on S1 RBD whereas cholesterol residue prefers hydrophobic region for interactions. Coulombic surface coloring defaults:  $\epsilon = 4r$ , thresholds  $\pm 10$  kcal/mol were used. Blue indicates surface with basic region whereas red indicates negatively charged surface. The hydrophobic surface was colored using the Kyte-Doolittle scale wherein blue, white and orange red colour indicates most hydrophilicity, neutral and hydrophobic region, respectively. UCSF Chimera was used for creating surfaces and rendering the images. Hydrogens are not shown for clarity.

197 **Pixatimod interacts with spike protein**

198 Spectroscopic studies with circular dichroism (CD) were undertaken to investigate direct binding  
199 of pixatimod to recombinant spike protein receptor binding domain (S1 RBD) (**Fig 2A,B**), the  
200 region which interacts with the ACE2 receptor on human cells. CD spectroscopy in the far UV  
201 region ( $\lambda = 190 - 260$  nm) detects conformational changes in protein secondary structure that occur  
202 in solution and can infer binding by an added ligand. Such secondary structural changes can be  
203 quantified using spectral deconvolution. SARS-CoV-2 EcS1-RBD (produced in *E. coli*, see  
204 Methods) underwent conformational change in the presence of either pixatimod or heparin as a  
205 comparator sulfated molecule known to bind the RBD (*6-10*), consisting of decreased  $\alpha$ -helical  
206 content for pixatimod and increased  $\alpha$ -helical content for heparin (**Fig 2C**). A decrease in global  $\beta$ -  
207 sheet content is observed for both pixatimod and heparin, along with increases in turn structure (**Fig**  
208 **2C**).

209  
210 We explored the effects of pixatimod on protein stability using differential scanning fluorimetry  
211 (DSF) in which the thermal denaturation of a protein is monitored in the presence of a hydrophobic  
212 fluorescent dye (20). Binding of pixatimod induced a notably large reduction in melting temperature  
213 ( $\Delta T_m$ ) of 9.1°C (**Fig 2D**;  $p=0.0001$ ), indicating major destabilisation of the mammalian expressed  
214 S1-RBD (mS1 RBD) protein. In contrast, heparin at an equivalent dose only partially destabilised  
215 the RBD protein, evidenced by a small side peak shifted by  $\sim 5-6^\circ\text{C}$  indicating populations of RBD  
216 in a bound and unbound state (**Fig 2D**).

217 The observed changes demonstrate that the SARS-CoV-2 S1 RBD interacts with pixatimod in  
218 aqueous conditions of physiological relevance. Notably, the conformational changes and  
219 destabilization observed were distinct for pixatimod compared to heparin, suggesting distinct  
220 interactions (**Fig 2**). Consistent with the modelling results, these data confirm direct interactions of  
221 pixatimod with S1 RBD, resulting in induction of a conformational change, consistent with the  
222 notion that HS mimetics such as pixatimod have the potential to interfere with S1-RBD interactions  
223 with ACE2.

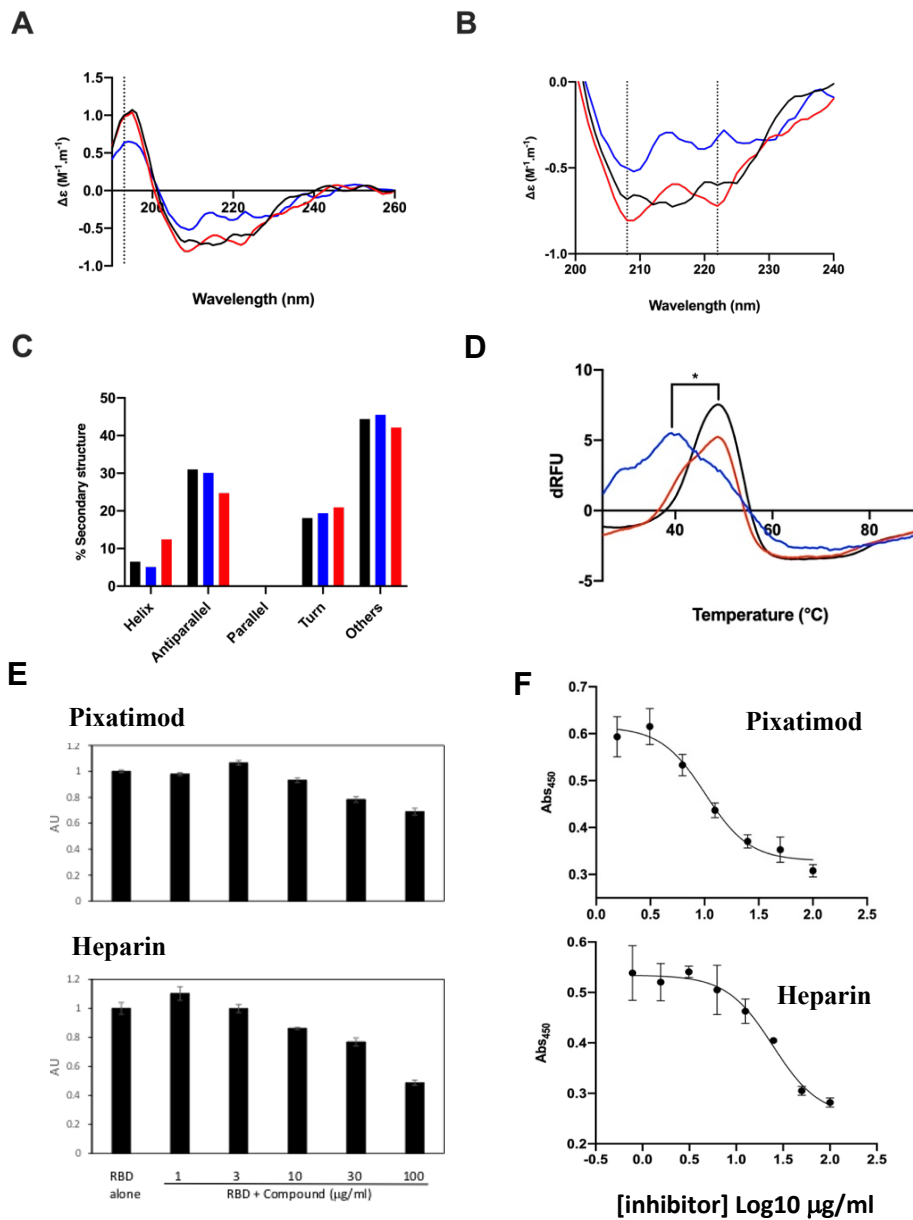

**Figure 2: Pixatimod interacts with SARS-CoV-2 S1-RBD and inhibits binding to cells and ACE2 receptor.** **A**, Circular dichroism spectra (190 - 260 nm) of SARS-CoV-2 EcS1-RBD alone (black), or with pixatimod (blue) or heparin (red). The vertical dotted line indicates 193 nm. **B**, The same spectra expanded between 200 and 240 nm. Vertical dotted lines indicate 222 nm and 208 nm. **C**, Secondary structure content analysed using BeStSel for SARS-CoV-2 EcS1-RBD.  $\alpha$ -helical secondary structure is characterized by a positive band at  $\sim$ 193 nm and two negative bands at  $\sim$ 208 and  $\sim$ 222 nm (analysis using BeStSel was performed on smoothed data between 190 and 260 nm). **D**, Differential scanning fluorimetry of binding of pixatimod (blue; 10  $\mu$ g) or heparin (red; 10  $\mu$ g) to mS1-RBD (1  $\mu$ g; black line, protein-only control). \* $T_m$  values for RBD alone (48.4°C, SD = 0.3) and in the presence of pixatimod (39.3°C, SD = 1) were statistically different,  $t(4) = 15.25$ ,  $p = 0.0001$ . **E**: dose response effects of pixatimod (E) and unfractionated porcine mucosal heparin (F) on binding of EcS1-RBD to Vero cells. Data were normalised to control with no addition of EcS1-RBD. AU, arbitrary units of fluorescence.  $n=3$  +/- CV. **F**, Competitive ELISA assay using biotinylated human ACE2 protein immobilized on streptavidin coated plates, to measure inhibition of binding of mS1-RBD in the presence of various concentrations of inhibitor compounds. Pixatimod ( $IC_{50}$ , 10.1  $\mu$ g/ml) and porcine mucosal heparin ( $IC_{50}$ , 24.6  $\mu$ g/ml).  $n=3$ , +/-SD; representative example shown.

### 260 **Pixatimod inhibits S1-RBD cell-binding**

261 We next evaluated inhibition of binding of His-tagged EcS1-RBD to monkey Vero cells (which are  
262 known to express both HS proteoglycans (HSPGs) and the ACE2 protein receptor required for  
263 SARS-CoV-2 attachment and cell invasion). Fixed cells were exposed to His-tagged S1 RBD for  
264 1hr, in the presence or absence of additional compounds, with subsequent washing and detection  
265 using a fluorescently-labelled anti-His tag antibody. A clear dose response was noted for both  
266 pixatimod and heparin as a comparator compound (**Fig 2E**), with 32% and 51% inhibition achieved  
267 at 100 µg/mL respectively. These data confirm that pixatimod can interfere with binding of S1-  
268 RBD to cells containing HSPGs and ACE2 protein receptors.

### 270 **Pixatimod directly inhibits S1-RBD binding to ACE2**

271 To further evaluate the mechanism of action of pixatimod its direct effects on the interaction of S1-  
272 RBD with the ACE2 protein receptor was measured using a competitive ELISA assay. Inhibition  
273 of binding of mS1-RBD preincubated with various concentrations of inhibitor compounds was  
274 measured by detection with an anti-RBD antibody. A dose response was observed with pixatimod  
275 showing an IC<sub>50</sub> of 10.1 µg/ml (**Fig 2F**). In comparison heparin also demonstrated inhibitory  
276 activity but with lower potency (24.6 µg/ml; **Fig 2F**). Importantly, this data confirms a direct  
277 mechanism of action of pixatimod via inhibition of S1-RBD binding to the ACE2 protein receptor.

### 279 **Pixatimod inhibits SARS-CoV-2 infection**

280 The effect of pixatimod on SARS-CoV-2 infection of Vero cells was examined using a standard  
281 plaque reduction neutralisation assay. Pixatimod was pre-incubated with the SARS-CoV-2 clinical  
282 isolate from Victoria, Australia (VIC01) for 1 hr before infecting the cells. Significant decreases  
283 were observed in the number of PFU after pixatimod treatment of SARS-CoV-2 (**Fig 3A**). Analysis  
284 of multiple dose response curves yielded an EC<sub>50</sub> for pixatimod in the range of 2.4-13.8 µg/mL  
285 (mean 8.1 µg/ml; n=3 assays) (**Table 1**). In comparison, an EC<sub>50</sub> of ~10 µg/ml has been observed  
286 for unfractionated heparin with a SARS-CoV-2 Italy UniSR1/2020 isolate (8) and 20-64 µg/ml for  
287 the SARS-CoV-2 VIC01 isolate (21).

288  
289 To establish that these antiviral effects were relevant for wider clinical viral isolates, assays were  
290 conducted with the isolate DE-Gbg20 from Sweden in a plaque reduction assay. Pixatimod  
291 inhibited infectivity of the DE-Gbg20 isolate with an EC<sub>50</sub> value of 2.7 µg/mL (**Fig 3B**), similar to  
292 that found in experiments with the VIC01 isolate. Analysis of pixatimod cytotoxicity for Vero cells  
293 using a tetrazolium-based assay revealed that pixatimod decreased by 50% (CC<sub>50</sub>) the viability of  
294 Vero cells at concentration >236 µg/mL, i.e., well above the EC<sub>50</sub> values observed in the plaque  
295 reduction assay (**Fig. 3B; Table 1**). Selectivity index (SI) values for pixatimod ranged from >17 to  
296 >98 for these assays.



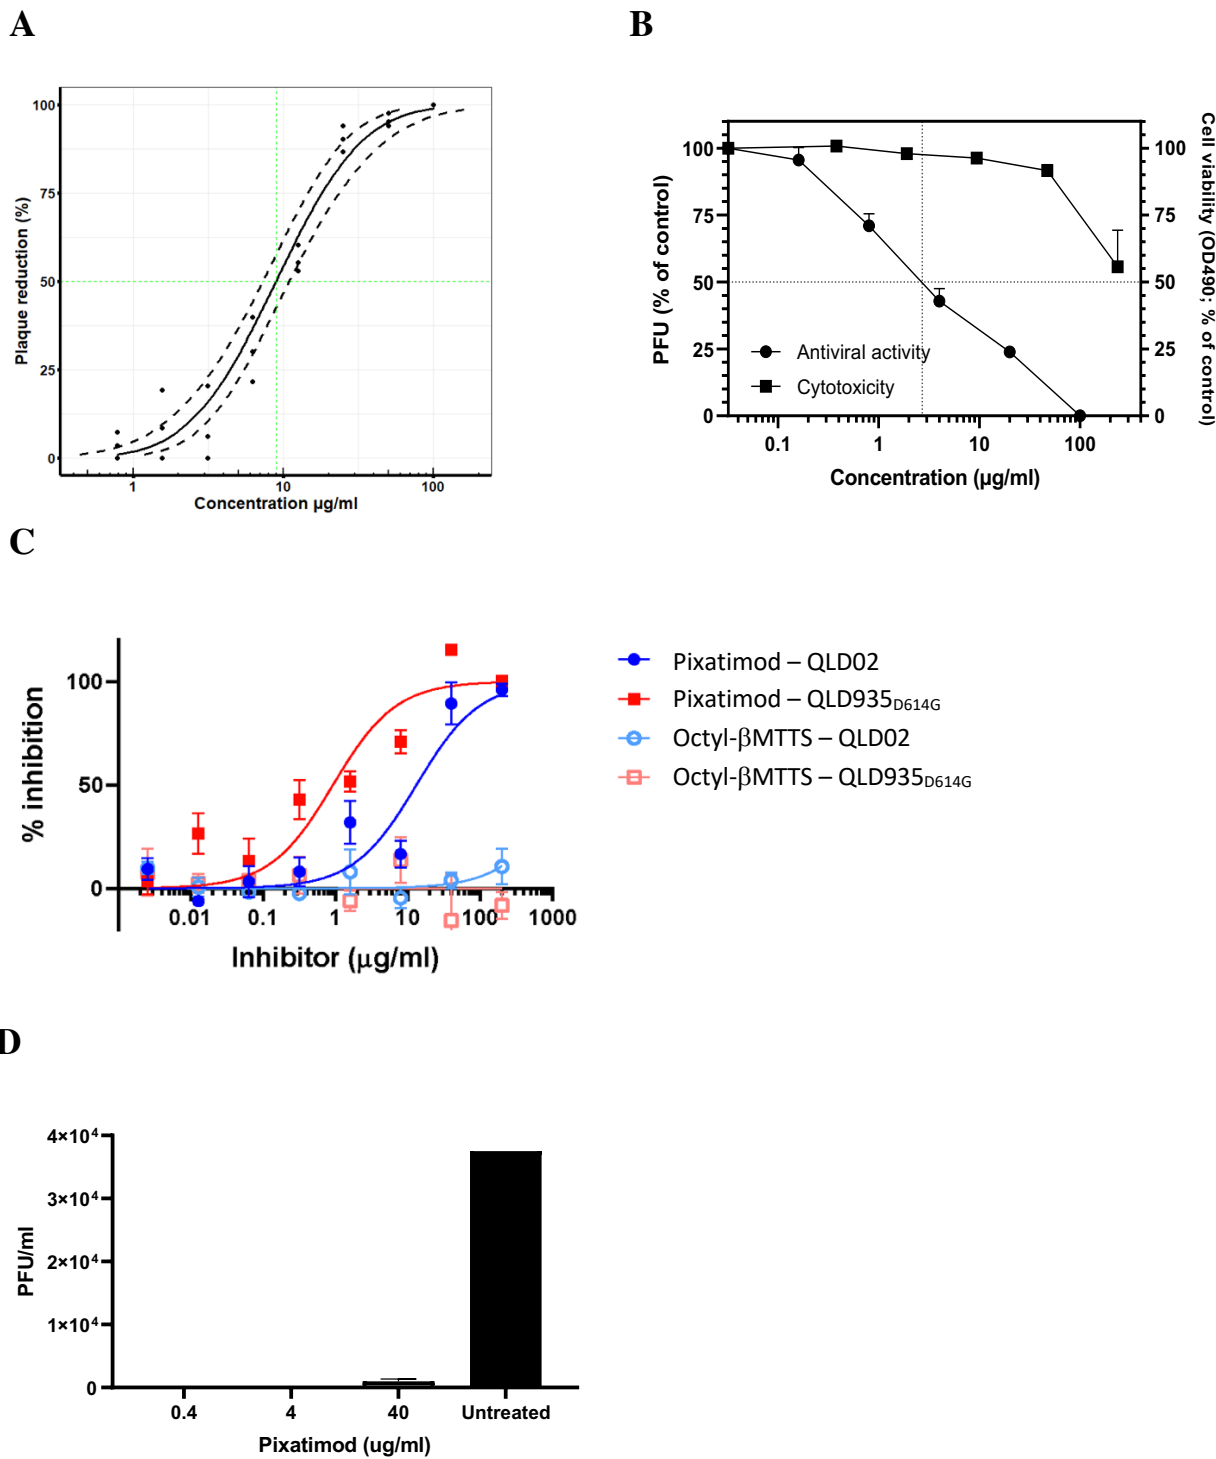

301

302

303

304

305

306

307

308

309

310

311

312

313

**Figure 3: Pixatimod inhibits infection of Vero and human bronchial epithelial cells with different SARS-CoV-2 virus isolates.** Live virus infectivity assays were performed as described in Methods for 3 different SARS-CoV-2 isolates (representative data shown). **A**, Plaque reduction neutralization assay of Victoria isolate (VIC01) with a Probit mid-point analysis curve  $\pm 95\%$  confidence intervals (dashed lines) ( $EC_{50}$  8.9  $\mu\text{g/ml}$ ; 95% CI, 7-11;  $n=3$ ). **B**, Plaque reduction assay of DE isolate,  $EC_{50}$  2.7  $\mu\text{g/ml}$ ;  $n=3$ ,  $\pm$  SD. **C**, Cytopathic assay of Queensland isolates,  $EC_{50}$  13.2 (QLD02) and 0.9 (QLD935 with D614G mutation)  $\mu\text{g/ml}$   $n=6$ ,  $\pm$  SEM. Representative examples are shown in each case. Results of pixatimod inhibition of SARS-CoV-2 infectivity are expressed as percent plaque reduction (A), plaque number as a percent of control (B), or percent inhibition from cytopathic effect (C). Panel B also shows cytotoxicity data for Vero cells for calculation of  $CC_{50}$  value ( $>236$   $\mu\text{g/ml}$ ). In panel C, data is also shown for octyl  $\beta$ -maltotetraoside tridecasulfate (Octyl- $\beta$ MTTS; Supplementary Materials Fig S2), an analogue of pixatimod which lacks the steroid side-chain. **D**, Plaque assay to measure inhibitory effect of pixatimod on viral shedding in BCI-NS1.1 bronchial epithelial

314 cells grown in an air liquid interface (ALI). ALI cultures were infected for 2h with SARS-CoV-2 (VIC01, MOI=0.2)  
 315 previously preincubated for 1 hr at 37°C with 0.4, 4 and 40 µg/ml of pixatimod or HBSS for untreated. After 72 hours  
 316 an apical rinse was performed with 200 µl of HBSS and 100 µl of the wash were used in a plaque assay in Vero E6  
 317 cells. Values are expressed as plaque forming unit (PFU)/ml, n= 2 +/- SD.

318

319

320

321

322

323

**Table 1: Anti-SARS-CoV-2 activities of pixatimod in Vero cells.**

| SARS-CoV-2 isolate | Assay Method      | EC <sub>50</sub> (µg/mL) <sup>a</sup> | CC <sub>50</sub> (µg/mL) | Selectivity Index <sup>a</sup> |
|--------------------|-------------------|---------------------------------------|--------------------------|--------------------------------|
| VIC01 isolate      | Plaque reduction  | 8.1 ± 3.1 (2.4-13.8) <sup>a</sup>     | >236 <sup>d</sup>        | 29 (>17 to >98 <sup>a</sup> )  |
| DE-Gbg20 isolate   | Plaque reduction  | 2.7 <sup>b</sup>                      |                          | >87                            |
|                    | Cytopathic effect | (0.8 – 11.6) <sup>c</sup>             |                          | >20 to >295                    |
| QLD02 isolate      | Cytopathic effect | 13.2 (8.0 – 21.6)                     |                          | >17                            |
| QLD935 isolate     | Cytopathic effect | 0.9 (0.4 – 1.9)                       |                          | >200                           |

324

325

326

327

328

329

330

331

<sup>a</sup> Mean values and individual assay result ranges, and resulting selectivity index ranges, in brackets.

<sup>b</sup> Mean EC<sub>50</sub> ±SE based on the data from three independent virus plaque reduction assays (PRNT<sub>50</sub> values).

<sup>c</sup> EC<sub>50</sub> computed by the Reed and Muench formula based on the cytopathic effect assay. Range indicates upper (complete protection of cells) and lower (partial protection) limits of EC<sub>50</sub> estimation.

<sup>d</sup> Cytotoxicity in Vero cells (determined at University of Gothenburg).

332 In addition to the plaque reduction assays pixatimod inhibition of SARS-CoV-2 infectivity was  
 333 assessed using assays that measured the cytopathic effects of the virus as an endpoint. Using the  
 334 Swedish DE-Gbg20 isolate, and two Australian isolates from Queensland (QLD02 and QLD935),  
 335 the EC<sub>50</sub> values for pixatimod inhibition of SARS-CoV-2 infectivity were determined to be 0.8-  
 336 11.6, 13.2 and 0.9 µg/mL, respectively (**Table 1**), values comparable with those observed for the  
 337 plaque reduction assays (**Table 1**). We also noted that a pixatimod analogue octyl β-maltotetraoside  
 338 tridecasulfate (without the steroid side-chain) (**Fig S2**) lacked efficacy for both QLD02 and  
 339 QLD935 isolates (**Fig 3C**), demonstrating the importance of the steroid side-chain for activity, and  
 340 supporting the notion of the sterol moiety promoting RBD switching position and enhancing  
 341 availability of the heparin binding site. Notably, both DE-Gbg20 and QLD935 isolates contain the  
 342 D614G mutation of the spike protein commonly present in recent isolates (**Table S1**) (22). The  
 343 QLD935 isolate exhibited lower cytopathicity, which could partially contribute to the observed  
 344 lower EC<sub>50</sub> for pixatimod against this isolate.

345

346 To provide evidence of antiviral properties of pixatimod in a more physiologically relevant model  
 347 for infection of human cells, we used a bronchial airway epithelial *in vitro* system of SARS-CoV-  
 348 2 infection and replication. The hTERT transformed bronchial epithelial cell line BCI-NS1.1  
 349 differentiates into airway multi-ciliated cells when grown in Transwells at the air-liquid interface  
 350 (ALI) cultures which show robust infection with SARS-CoV-2 when harvested 72 h after  
 351 inoculation (23,24). To validate this model we firstly infected ALI bronchial cultures by adding  
 352 SARS-CoV-2 (VIC01, MOI=0.2) on the apical side of the culture system and measured up to 1000

fold increase in viral RNA between 2h and 72h post-infection, measured by RT-PCR of viral RNA using primers for N2/N3 regions of the N gene of SARS-CoV-2 (**Fig S3, panel A**). To determine if pixatimod has inhibitory effects on SARS-CoV-2 infection and replication in this model, the virus was preincubated with 0.4, 4 or 40  $\mu\text{g/ml}$  of pixatimod (or HBSS for untreated) for 1 hr at 37°C before the inoculum was added to the apical side of the cells. We examined infectious virus in the apical wash from BCI ALI cultures by plaque assay on Vero E6 cells. Viral shedding of ALI cultures infected with SARS-CoV-2 in the presence of 0.4 and 4  $\mu\text{g/ml}$  pixatimod was completely abolished in comparison to the cells infected with the untreated virus as a control (**Fig 3D**), whereas at 40  $\mu\text{g/ml}$  pixatimod resulted in >40 fold reduction in PFU/ml (**Fig 3D**). To corroborate these findings viral shedding from the apical side of the culture and viral load in the infected cells was also measured by RT-PCR. Incubation of SARS-CoV-2 with different concentrations of pixatimod reduced SARS-CoV-2 shedding from ALI cells into the apical phase by > 98%, and reduced SARS-CoV-2 RNA within the cells by >97% at 72hr at all pixatimod doses, compared to untreated infected cells (**Fig S3, panels A & B**). Notably, efficacy at 0.4 and 4  $\mu\text{g/ml}$  was >99% in both cases indicating high potency of pixatimod in inhibition of SARS-CoV-2 infection of human bronchial cells. Overall, these data in a physiologically-relevant human bronchial cell model show that pixatimod is a potent inhibitor of SARS-CoV-2 in terms of both lowering viral shedding in the apical compartment and viral load in the cell layer.

#### **Pixatimod inhibits SARS-CoV-2 infection *in vivo***

The potential efficacy of pixatimod *in vivo* was explored with an established SARS-CoV-2 lethal infection model using hACE2 transgenic mice wherein hACE2 is expressed behind a keratin 18 promoter (25-28). Virus was inoculated in 50  $\mu\text{l}$  via the intranasal route into the lungs (25-27). A single prophylactic treatment of 16 mg/kg of pixatimod was given to K18-hACE2 mice one day before intranasal infection with SARS-CoV-2. Two control groups were included, K18-hACE2 mice that were treated with saline and infected with virus, and C57BL/6J mice given pixatimod but no virus. Mice were weighed daily and euthanized on day 5 when weight loss approached 20%, the ethically defined endpoint. As reported previously in other preclinical models of infectious disease (18,19), pixatimod led to an initial bodyweight loss of 8%. Weight loss was thus presented relative to day 1 post-infection in order to focus on infection-induced weight loss (**Fig. 4A**), which generally occurs after day 3 (26). The mean weight loss for saline-treated K18-hACE2 mice was significantly higher than for pixatimod treated K18-ACE2 mice ( $p=0.043$ , repeat measures ANOVA including data from days 4 and 5), with the latter showing no significant infection-associated weight loss (**Fig. 4A**).

Tissue viral loads were assessed on day 5 post infection, with pixatimod-treated animals showing a significant 3.1  $\log_{10}$  fold reduction in viral titers in nasal turbinates ( $p=0.037$ , Kolmogorov Smirnov test, non-parametric data distribution), and a 4.6  $\log_{10}$  fold reduction in viral titers in brain, which approached significance ( $p=0.0588$ , t test, parametric data distribution). Viral titers in the lungs were not significantly affected by pixatimod treatment (**Fig 4B**). In view of the robust nature of this model, with rapid effects such as massive weight loss and high level of lethality, these data indicate a remarkable prophylactic anti-SARS-CoV-2 effect of pixatimod.

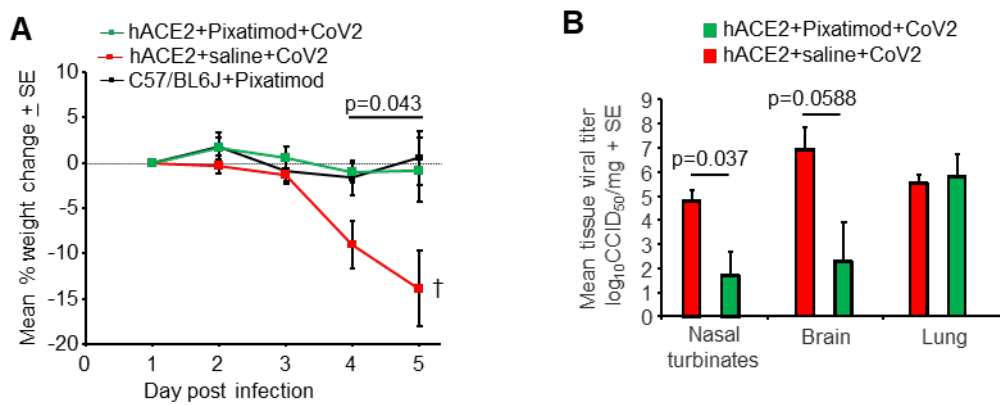

397

398 **Fig 4: Pixatimod inhibits SARS-CoV-2 infection in K18 hACE2 transgenic mice.** (A) Mean percentage weight  
399 change relative to day 1 post infection. Statistics by repeat measures ANOVA for days 4 and 5. n=4 mice per group,  
400 +/- SE. Mice were euthanized on day 5. (B) Mean tissue titres on day 5 post infection. Statistics by Kolmogorov  
401 Smirnov test (Nasal turbinates) and t test (Brain). n=4 mice per group, +/- SE.

402

## 403 Discussion

404 The current COVID-19 pandemic illustrates the critical need to develop both effective vaccines and  
405 therapeutics for emerging viruses; established antiviral agents appear to have limited utility against  
406 SARS-CoV-2. Owing to their use as a means of cell attachment by many viruses, HS represents an  
407 ideal broad-spectrum antiviral target (2). Binding of a viral protein to cell-surface HS is often the  
408 first step in a cascade of interactions that is required for viral entry and the initiation of infection  
409 (29). As HS and heparin contain the same saccharide building blocks and HS-binding proteins also  
410 interact with heparin, this drug is gaining attention beyond its anticoagulant properties in COVID-  
411 19 treatment (29). Here we demonstrate a direct mechanism of action of pixatimod on attenuating  
412 S1-RBD binding to ACE2. These data are supported by recent studies on heparin using native mass  
413 spectrometry (30), and also reveal for the first time the ability of HS mimetics to inhibit S1-RBD  
414 binding to ACE2.

415

416 Heparin has been shown to inhibit binding of SARS-CoV-2 spike protein to a human cell line (31),  
417 and to inhibit entry into human cells of pseudovirus carrying the SARS-CoV-2 spike protein  
418 (10,32). However, the question of whether therapeutic doses of heparins are effective for COVID-  
419 19 patients as an antiviral treatment awaits the outcome of clinical trials; bleeding complications  
420 are possible (33), though non-anticoagulant heparin or HS preparations could be deployed that  
421 reduce cell binding and infectivity without a risk of causing bleeding (9,10). However, HS mimetics  
422 offer additional advantages in comparison to heparin beyond simply reducing anticoagulant activity  
423 (9), most notably their ready availability at scale via synthetic chemistry production that addresses  
424 the well-known fragility of the heparin supply chain (11). As a clinical-stage HS mimetic,  
425 pixatimod provides better control over structure, molecular weight diversity (a single molecular  
426 entity), sulfation, purity and stability. Herein, we reveal a direct interaction of the clinical candidate  
427 pixatimod with the S1 spike protein RBD, supported by molecular modelling data. Pixatimod also  
428 inhibited the interaction of S1 RBD with Vero cells which express the ACE2 receptor. Moreover,  
429 infectivity assays, of two types (plaque reduction and cytopathic effect, Table 1) confirm pixatimod  
430 is a potent inhibitor of SARS-CoV-2 infection of Vero cells, at concentrations ranging from 0.8 to

431 13.8  $\mu\text{g}/\text{mL}$  which are well within its known therapeutic range. Interestingly, we noted that the  
432 lipophilic steroid side chain of pixatimod was critical for its potency and is predicted from  
433 modelling to interact with S1-RBD. This unique feature, making it an unusual amphiphilic HS  
434 mimetic, has also been shown to confer virucidal activity against Herpes Simplex virus by  
435 disruption of the viral lipid envelope (15).

436

437 Pixatimod has only mild anti-coagulant activity, and has been administered i.v. to over 80 cancer  
438 patients, being well tolerated with predictable pharmacokinetics (PK) and no reports of heparin-  
439 induced thrombocytopenia (12). Further, cytotoxicity *in vitro* is low; we observed a  $\text{CC}_{50} > 100$   
440  $\mu\text{M}$  ( $> 236 \mu\text{g}/\text{mL}$ ) in Vero cells, consistent with cytotoxicity data on human cells (34). Importantly,  
441 the maximum plasma concentration ( $C_{\text{max}}$ ) of pixatimod following a single treatment of 100 mg  
442 in cancer patients is  $29.5 \mu\text{g}/\text{mL}$  with a  $C_{\text{min}}$  of  $2.7 \mu\text{g}/\text{mL}$  measured one week following treatment  
443 (12), indicating that an equivalent dosing regimen should be sufficient to achieve antiviral activity  
444 in human subjects. The low anticoagulant activity of pixatimod is an advantage since it could be  
445 used as a direct antiviral agent in combination therapies with heparins, which are being used to treat  
446 coagulopathies observed in COVID-19 patients (35). It was also encouraging that pixatimod  
447 inhibition of multiple clinical isolates of SARS-CoV-2 was noted, demonstrating potential for  
448 widespread effectiveness. The presence of multiple binding sites for pixatimod in the Spike protein  
449 would suggest robustness against mutations that may arise later in pandemic and/or in the following  
450 coronavirus outbreaks. While recent widespread isolates with D614G spike mutants appear to be  
451 2-3 fold more sensitive to the antiviral activity of pixatimod, caution needs to be taken in  
452 interpreting the data of the cytopathicity assay used to determine this activity as G614 isolates (at  
453 least QLD935) exhibited lower cytopathicity than D614 isolates.

454

455 Since SARS-CoV-2 is predominantly a respiratory infection, our data from human bronchial cells  
456 are directly supportive of high potency of pixatimod against infection of clinically relevant human  
457 cells. Further, the potential efficacy in humans is supported by our initial data from the established  
458 K18 hACE2 transgenic mouse model which demonstrated the ability to rescue the dramatic weight  
459 loss phenotype observed. Given the half-life of pixatimod in mice is 38h (34), compared to 141h in  
460 human (13), future studies should adopt repeat-dose schedules to identify the optimal schedule in  
461 models of SARS-CoV-2 infection. We also suggest that direct intranasal delivery of pixatimod  
462 would be worth investigation, in view of recent positive data on the delivery of nebulized heparin  
463 for treatment of ARDS (36) which has significance for potential application of heparin in COVID-  
464 19 treatment (21).

465

466 Why Pixatimod should have such a dramatic effect in nasal turbinates and brain, but not lungs in  
467 the K18 hACE2 model is unclear but may reflect very high lung (supra-physiological) K18-driven  
468 hACE2 receptor expression in the lungs in this model (27) and/or pharmacokinetics (34).  
469 Nevertheless the results are encouraging, as the initial infection in humans occurs in the upper  
470 respiratory tract, with ARDS developing only after infection has over time spread down into the  
471 lungs (37). This progression is not recapitulated in the mouse model where fulminant lung infection  
472 requires direct inoculation of virus into the lungs via the intranasal route. Infection of the brain  
473 may occur via the olfactory epithelium (38) so the reduced infection of brain may reflect the reduced  
474 infection of nasal turbinates. Although CNS involvement in COVID-19 in humans is now well

475 documented<sup>32</sup>, the fulminant brain infection seen in this mouse model does not seem to be a feature  
476 of human disease.

477  
478 It is notable that there are multiple potential mechanisms of action of pixatimod against SARS-  
479 CoV-2 (summarised in **Fig 5**), including direct inhibition of HS-Spike-ACE2 interactions via  
480 complex and multiple interactions with amino acids in RBD. Notably, the latter contrasts with the  
481 more restricted epitopes typical of antibodies which are observed to be subject to mutational escape  
482 potentially requiring vaccine redesign or use of multivalent strategies (39). In this respect we  
483 speculate that heparin mimetics like pixatimod may prove important therapeutic tools for initial  
484 responses to escape variants. Beyond this, pixatimod also has immunomodulatory effects which  
485 may alleviate some of the immunopathologies associated with moderate-severe COVID-19 disease.  
486 Pixatimod also inhibits the pro-inflammatory enzyme heparanase (34) and has been demonstrated  
487 to suppress IL-6 in inflammatory (pancreatitis) and viral (Ross River virus) animal models (14, 18).  
488 Moreover, it blocks the heparanase-dependent invasion of macrophages into tumours in mouse  
489 cancer models (35) which may be relevant to invasion of monocytes and macrophages into the  
490 lungs associated with severe COVID-19 disease (40). Vaccinia virus has recently been shown to  
491 rely on host heparanase to degrade HS in order to spread to distant sites (41), revealing a role for  
492 heparanase in the progression of disease that may also apply for SARS-CoV-2 in COVID-19.  
493 Notably, increased plasma heparanase activity is associated with COVID-19 (42). Thus multiple  
494 additional beneficial effects of pixatimod might be anticipated from its heparanase inhibitory  
495 properties.

496  
497 Based on the data presented here, pixatimod has potent antiviral activity against SARS-CoV-2 at  
498 therapeutically relevant concentrations both *in vitro* and *in vivo*, and against relevant human  
499 bronchial cells. These activities are in addition to the known heparanase-inhibitory and  
500 immunomodulatory properties of pixatimod which may further support the host response to  
501 COVID-19 infection. Collectively this provides a strong rationale to justify entry of pixatimod into  
502 clinical trials for COVID-19. Furthermore, we have demonstrated the first proof-of-concept for  
503 employing HS mimetics against SARS-CoV-2 with implications for wider future applications of  
504 this class of broad-spectrum antivirals, potentially against SARS-CoV-2 escape variants, other HS-  
505 binding viruses and also those that may emerge as future global threats.

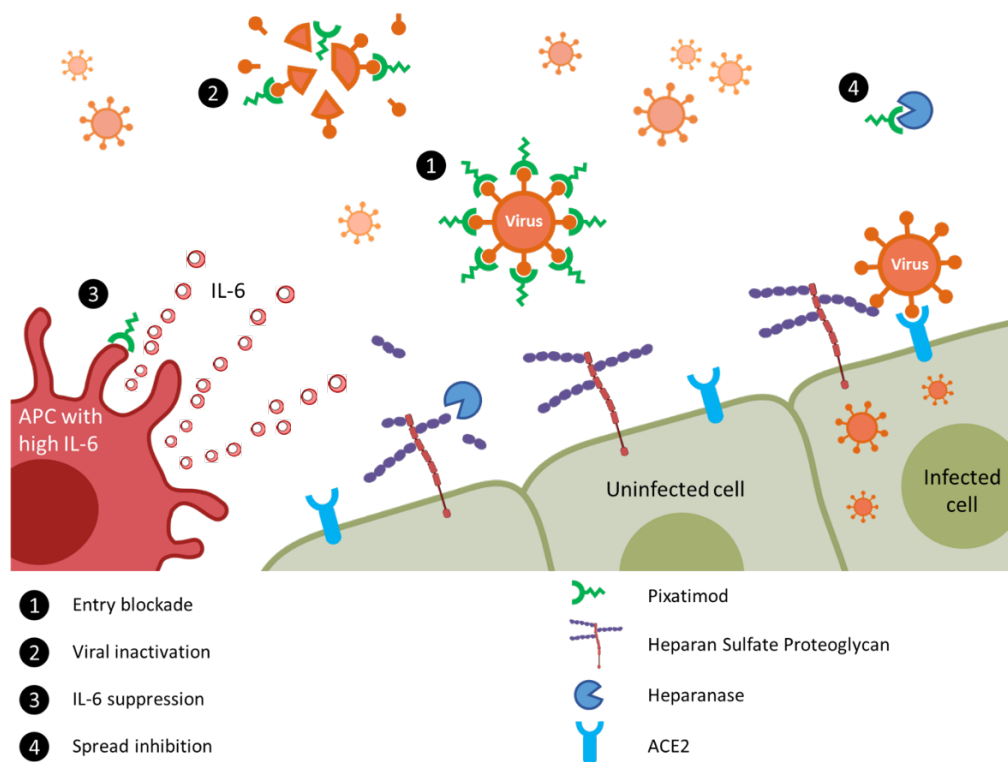

**Figure 5: Proposed multi-modal mechanisms of pixatimod activity against SARS-CoV-2 and other viruses.** The principal mode of action demonstrated here is that pixatimod acts as a decoy receptor<sup>1</sup>, blocking S1-RBD binding to HS co-receptors and inhibiting viral attachment to host cells, thus blocking viral infection. Additional potential modes of action include: [2] virucidal activity of pixatimod, dependent upon the cholestanol moiety<sup>15</sup>, which may lead to degradation and permanent inactivation of SARS-CoV-2 virus particles; [3] suppression of IL-6 secretion by antigen presenting cells, primarily macrophages<sup>14</sup>; and [4] blocking viral escape from host cells by inhibiting heparanase which otherwise promotes viral escape by cleaving HS receptors<sup>41,42</sup>.

## Materials and Methods

**Computational methods:** The crystal structure of the RBD-ACE2 complex (PDB ID: 6LZG) was retrieved from the RCSB Protein Data Bank. Structures were stripped of water molecules, ACE2 chain and any cofactors and/or ligands present. UCSF Chimera was used to edit the structure and for visualisation. Without prior knowledge of the pixatimod binding site, one molecule of the ligand was placed in the simulation system containing the protein, solvent and ions and molecular dynamics (MD) simulations were performed for 600 ns using the AMBER16 package. Such unguided simulations, as reviewed before (43), have been used to predict the binding sites on a protein's surface and drive the design of new ligands. All the MD simulations were carried out using the pmemd.cuda module (44) of the AMBER 16 molecular dynamics package and the analyses were performed using the cpptraj module of AmberTools16 (45). Simulation systems were set up by placing the spike RBD domain at the centre of the octahedral simulation box (with an extension of at least 12 Å from each side). Pixatimod was randomly placed in the box. This was followed by addition of TIP3P water (46) and Na<sup>+</sup> ions for neutralising the charge of the system. Proteins were parameterized using the Amber99SB-ildn force field (47) whereas Glycam-06

536 (version j) (48) and Lipid14 (49) force fields were used for the sulfated tetrasaccharide and  
537 cholesterol moieties of pixatimod, respectively. Four replicates of the unguided simulations were  
538 performed ( $4 \times 600$  ns). Periodic boundary conditions were applied, and the time step was set to 2  
539 fs. The electrostatic energy was calculated with the particle mesh Ewald (PME) method. SHAKE  
540 constraints were applied on the bonds involving hydrogen. A cut-off of 12 Å was applied to the  
541 Lennard-Jones and direct space electrostatic interactions with a uniform density approximation  
542 included to correct for the long-range van der Waals interactions.

543 The system was first minimized without electrostatics for 500 steps, then with a restraint of 25  
544 kcal/(mol Å<sup>2</sup>) applied on the protein and pixatimod. This minimization was followed by 100-ps  
545 MD simulation with 25 kcal/(mol Å<sup>2</sup>) positional restraints applied on the protein and ligand, and  
546 the temperature was slowly increased from 0 to 300 K. Then, followed by 500 steps of steepest  
547 descent cycles followed by 500 steps of conjugate gradient minimization, and 50-ps equilibrations  
548 with a restraint force constant of 5 kcal/(mol Å<sup>2</sup>) in the protein and ligand, followed by final 2 ns  
549 equilibration without restraints to equilibrate the density. The first few steps were all carried out at  
550 constant volume followed by at least 600 ns production MD simulation at 300 K (Langevin  
551 dynamics, collision frequency: 5/ps) with 1-atm constant pressure. Trajectories were collected and  
552 data analyses such as RMSD, RMSF and free energy of binding were performed on the last 30000  
553 frames. The binding free energy and pairwise residue contributions (50) were calculated using the  
554 Molecular mechanics-Generalized Born (GB) equation (MM/GBSA) procedure implemented in  
555 AmberTools16. The details of this method have been extensively reviewed (51). The polar  
556 solvation energy contribution was calculated by using GB<sup>OPBC II</sup> (igb= 5) (52). The value of the  
557 implicit solvent dielectric constant and the solute dielectric constant for GB calculations was set to  
558 80 and 1, respectively. The solvent probe radius was set to 1.4 Å as default. The entropy calculation  
559 is computationally expensive and therefore not performed for the purposes of this study.

560 **Expression of His-tagged recombinant SARS-CoV-2 S1 RBD in *E. coli*:** Residues 330–583 of  
561 the SARS-CoV-2 spike protein (GenBank: MN908947) were cloned upstream of a N-terminal  
562 6XHisTag in the pRSETA expression vector and transformed into SHuffle® T7 Express Competent  
563 *E. coli* (NEB, UK). Protein expression was carried out in MagicMedia™ *E. coli* Expression Media  
564 (Invitrogen, UK) at 30°C for 24 hrs, 250 rpm. The bacterial pellet was suspended in 5 mL lysis  
565 buffer (BugBuster Protein Extraction Reagent, Merck Millipore, UK; containing DNase) and  
566 incubated at room temperature for 30 mins. Protein was purified from inclusion bodies using IMAC  
567 chromatography under denaturing conditions. On-column protein refolding was performed by  
568 applying a gradient with decreasing concentrations of the denaturing agent (from 8M Urea). After  
569 extensive washing, protein was eluted using 20 mM NaH<sub>2</sub>PO<sub>4</sub>, pH 8.0, 300 mM NaCl, 500 mM  
570 imidazole. Fractions were pooled and buffer-exchanged to phosphate-buffered saline (PBS; 140  
571 mM NaCl, 5 mM NaH<sub>2</sub>PO<sub>4</sub>, 5 mM Na<sub>2</sub>HPO<sub>4</sub>, pH 7.4; Lonza, UK) using Sephadex G-25 media (GE  
572 Healthcare, UK). Recombinant protein (termed EcS1-RBD) was stored at -4°C until required.

573 **Expression of S1-RBD in mammalian cells:** Secreted RBD-SD1 (termed mS1-RBD) was  
574 transiently produced in suspension HEK293-6E cells. A plasmid encoding RBD-SD1, residues  
575 319–591 of SARS-CoV-2 S were cloned upstream of a C-terminal HRV3C protease cleavage site,  
576 a monomeric Fc tag and an His<sub>8x</sub> Tag were a gift from Jason S. McLellan, University of Texas at



577 Austin. Briefly, 100 mL of HEK293-6E cells were seeded at a cell density of  $0.5 \times 10^6$  cells/ml  
578 24hr before transfection with polyethyleneimine (PEI). For transfection, 100  $\mu\text{g}$  of the ACE2  
579 plasmid and 300  $\mu\text{g}$  of PEI (1:3 ratio) were incubated for 15 min at room temperature. Transfected  
580 cells were cultured for 48 hr and fed with 100 mL fresh media for additional 48 hr before harvest.  
581 RBD-SD1 was purified by HiTrap Protein G HP column (GE Healthcare, US) pre-equilibrated in  
582 PBS and eluted with 0.1 M glycine (pH 2.7). Purity of proteins was evaluated by Coomassie staining  
583 of SDS-PAGE gels, and proteins were quantified by BCA Protein Assay Kit (Thermo Scientific).

584 ***Secondary structure determination of SARS-CoV-2 S1 RBD by circular dichroism spectroscopy:***

585 The circular dichroism (CD) spectrum of the SARS-CoV-2 S1 RBD in PBS was recorded using a  
586 J-1500 Jasco CD spectrometer (Jasco, UK), Spectral Manager II software (JASCO, UK) using a  
587 0.2 mm path length, quartz cuvette (Hellma, USA). All spectra were obtained using a scanning of  
588 100 nm/min, with 1 nm resolution throughout the range  $\lambda = 190 - 260$  nm and are presented as the  
589 the mean of five independent scans, following instrument calibration with camphorsulfonic acid.  
590 SARS-CoV-2 S1 RBD was buffer-exchanged (prior to spectral analysis) using a 10 kDa Vivaspin  
591 centrifugal filter (Sartorius, Germany) at 12,000 g, thrice and CD spectra were collected using 21  
592  $\mu\text{L}$  of a 0.6 mg/mL solution in PBS, pH 7.4. Spectra of heparin (unfractionated porcine mucosal  
593 heparin, Celsus) were collected in the same buffer at approximately comparable concentrations,  
594 since this is a polydisperse material. Collected data were analysed with Spectral Manager II  
595 software prior to processing with GraphPad Prism 7, using second order polynomial smoothing  
596 through 21 neighbours. Secondary structural prediction was calculated using the BeStSel analysis  
597 server (53).

598 To ensure that the CD spectral change of SARS-CoV-2 S1 RBD in the presence of pixatimod did  
599 not arise from the addition of the compound alone, a difference spectrum was analysed. The  
600 theoretical CD spectrum that resulted from the arithmetic addition of the CD spectrum of the SARS-  
601 CoV-2 S1 RBD and that of pixatimod differed from the observed experimental CD spectrum of  
602 SARS-CoV-2 S1 RBD mixed with compound alone. This demonstrates that the change in the CD  
603 spectrum arose from a conformational change following binding to pixatimod (Supplementary  
604 Materials, Fig S3).

605 ***Differential scanning fluorimetry:*** Differential scanning fluorimetry (DSF) was conducted on  
606 mammalian expressed mS1-RBD (1  $\mu\text{g}$ ) in PBS pH 7.6 and 1.25 X Sypro Orange (Invitrogen) to  
607 a total well volume of 40  $\mu\text{L}$  in 96-well qPCR plates (AB Biosystems). Unfractionated porcine  
608 mucosal heparin (Celsus) or pixatimod (10  $\mu\text{g}$ ) were introduced to determine the effect on the  
609 thermal stability of, mS1-RBD using an AB biosystems StepOne plus qPCR machine, employing  
610 the TAMRA filter setting. Melt curve experiments were performed following a 2-minute initial  
611 incubation at 25  $^{\circ}\text{C}$ , with succeeding 0.5  $^{\circ}\text{C}$  increments every 30 s up to a final temperature of  
612 90 $^{\circ}\text{C}$ . Control wells containing H<sub>2</sub>O, heparin or pixatimod (10  $\mu\text{g}$ ) without mS1-RBD (1  $\mu\text{g}$ ) also  
613 employed to ensure a change in the melt curve was solely a result of protein-ligand interactions and  
614 interactions with Sypro Orange. Smoothed first derivative plots (9 neighbours, 2<sup>nd</sup>-order  
615 polynomial, Savitzky-Golay) were constructed using Prism 8 (GraphPad).  $T_m$  values were  
616 calculated using MatLab software (R20018a, MathWorks) and  $\Delta T_m$  values determined from the  
617 difference between the  $T_m$  of RBD alone or in the presence of heparin or pixatimod.

518 **Cell binding of S1 RBD:** African green monkey Vero kidney epithelial cells (Vero E6) were  
519 purchased from ATCC. Cells were maintained at 50-75% confluence in DMEM supplemented  
520 with 10% foetal bovine serum, 20 mM L-glutamine, 100 U/mL penicillin-G and 100 U/mL  
521 streptomycin sulfate (all purchased from Gibco/ThermoFisher, UK). Cells were maintained at 37  
522 °C, in 5% CO<sub>2</sub> and plated into 96-well cell culture plates at 1000 cells/well in 100 µL of  
523 maintenance medium. Cells were allowed to adhere overnight. Medium was aspirated and wells  
524 were washed 3x with 200 µL calcium, magnesium-free PBS (CMF-PBS, Lonza, UK). Cells were  
525 fixed with 100 µL 10% neutral buffered Formalin (Thermofisher, UK) for 10 minutes at room  
526 temperature, then washed 3x with 200 µL CMF-PBS. 100 µL CMF-PBS was added to each well  
527 and plates were stored at 4 °C until use. Before use, wells were blocked with 200 µL CMF-PBS +  
528 1% BSA (Sigma-Roche, UK) for 1 hour at room temperature, and washed 3x with 200 µL CMF-  
529 PBS + 0.1% Tween-20 (PBST, Sigma-Roche, UK) followed by 2x with 200 µL CMF-PBS.  
530 His-tagged S1-RBD (50 µg/mL) and compounds at indicated concentrations were added to each  
531 well in 25 µL PBST + 0.1% BSA as indicated. Wells were incubated for 1 hour at room temperature  
532 with rocking. Wells were washed 3x with 200 µL PBST and 2x with 200 µL CMF-PBS. Binding  
533 of His-tagged S1-RBD was detected with Alexa Fluor 488 anti-his tag antibody (clone J095G46,  
534 Biolegend, UK) 1:5000 in 25 µL PBST + 0.1% BSA per well. Wells were incubated in the dark  
535 for 1 hour at room temperature with rocking. Wells were washed 3x with 200 µL PBST and 2x  
536 with 200 µL CMF-PBS. Fluorescence was read at Ex. 485:Em 535 on a Tecan Infinite M200Pro  
537 plate reader. Results are presented as normalized mean (where 0 is the fluorescence without added  
538 S1-RBD, and 1 is the fluorescence with 50 µg/mL S1-RBD; ± %CV, n=3).

539  
540 **Competition ELISA for S1 RBD binding to ACE2:** High binding 96 well plates (Greiner) were  
541 coated with 3 µg/mL streptavidin (Fisher) in 50 mM sodium carbonate buffer pH 9.6 (50 µL/ well)  
542 for 1 hour at 37 °C. Plates were washed 3 times with 300 µL PBS, 0.2% Brij35 (PBSB) and blocked  
543 with 300 µL PBSB + 1% casein for 1 hour at 37 °C. Plates were washed a further 3 times with 300  
544 µL PBSB prior to the addition of 100 ng/mL Biotinylated ACE2 (Sino Biological) in PBSB + 1%  
545 casein (50 µL/ well) and incubated for 1 hour at 37 °C. Plates were again washed 3 times with 300  
546 µL PBSB prior to the addition of 50 µL/well mS1-RBD (5µg/mL) in PBSB + 1% casein, which had  
547 been pre-incubated for 30 minutes at room temperature with or without varying concentrations of  
548 heparin or pixatimod (100- 0.7 µg/mL) in separate tubes. Plates were incubated for 1 hour at 37 °C  
549 to allow for mS1-RBD-ACE2 binding and were subsequently washed with 300 µL/well PBSB.  
550 Bound mS1-RBD was detected by incubation with 0.5 µg/mL Rabbit-SARS-CoV-2 (2019-nCoV)  
551 Spike RBD Antibody (Stratech) in PBSB + 1% casein (50 µL/well) for 1 hour at 37 °C. Following  
552 a further 3 washes with PBSB plates were incubated for 30 minutes at 37 °C with horseradish  
553 peroxidase conjugated Donkey anti-Rabbit IgG diluted 1:1000, v/v in PBSB + 1% casein  
554 (Bioledgend). Plates were washed a final 5 times with 300 µL PBSB before being developed for 10  
555 minutes with 3,3',5,5'- tetramethylbenzidine prepared according to the manufacturer's instructions  
556 (Fisher). Reactions were stopped by the addition of 20 µL 2M H<sub>2</sub>SO<sub>4</sub> and plates were read at λ =450  
557 nm using a Tecan Infinite M200 Pro mulit-well plate reader (Tecan Group). Control wells  
558 containing no biotinylated ACE2 were employed to ensure binding was specific.

559

560 **Live SARS-CoV-2 virus assays:** SARS-CoV-2 Victoria isolate (GISAID accession,  
561 EPI\_ISL\_406844): a plaque reduction assay was performed with the SARS-CoV-2  
562 Victoria/01/2020 (passage 3) isolate, generously provided by The Doherty Institute, Melbourne,  
563 Australia at P1, was diluted to a concentration of  $1.4 \times 10^3$  pfu/mL (70 pfu/50 $\mu$ L) in minimal  
564 essential media (MEM) (Life Technologies, California, USA) containing 1% (v/v) foetal calf serum  
565 (FCS) (Life Technologies) and 25 mM HEPES buffer (Sigma) and mixed 50:50 with pixatimod  
566 dilutions, in a 96-well V-bottomed plate. The plate was incubated at 37 °C in a humidified box for  
567 1 hour to allow the virus to be exposed to pixatimod. The virus-compound mixture was transferred  
568 onto the wells of a washed 24-well plate that had been seeded with Vero E6 cells  
569 [ECACC 85020206] the previous day at  $1.5 \times 10^5$  cells/well. The virus-compound mixture was left  
570 to adsorb for an hour at 37°C, then plaque assay overlay media was applied (MEM containing 1.5%  
571 carboxymethylcellulose (Sigma, Dorset, UK), 4% (v/v) FCS and 25 mM HEPES buffer). After  
572 incubation at 37 °C in a humidified box, for 5 days, plates were fixed overnight with 20% (v/v)  
573 formalin/PBS, washed with tap water and then stained with methyl crystal violet solution (0.2%  
574 v/v) (Sigma) and plaques were counted. Compound dilutions were performed in either duplicate or  
575 quadruplicate. Compound dilutions and cells only were run in duplicate, to determine if there was  
576 any cell cytotoxicity. A mid-point probit analysis (written in R programming language for statistical  
577 computing and graphics) was used to determine the amount ( $\mu$ g/mL) required to reduce SARS-  
578 CoV-2 viral plaques by 50% (PRNT50) compared with the virus only control (n=5). An internal  
579 positive control for the PRNT assay was run in triplicate using a sample of heat-inactivated human  
580 MERS convalescent serum known to neutralise SARS-CoV-2 (National Institute for Biological  
581 Standards and Control, UK).

582  
583 SARS-CoV-2 DE-Gbg20 isolate (GISAID accession under application): Plaque reduction assay  
584 for SARS-CoV-2 clinical isolate DE-Gbg20 from Sweden was performed in a similar manner,  
585 except for the virus and the pixatimod (fivefold decreasing concentrations at a range 100-0.16  
586  $\mu$ g/ml) were diluted in DMEM supplemented with 2% heat-inactivated FCS, and 100 U of penicillin  
587 and 60  $\mu$ g/ml of streptomycin (DMEM-S). The virus (100 PFU) and pixatimod (fivefold decreasing  
588 concentrations at a range 100 – 0.16  $\mu$ g/ml) were mixed and incubated for 30 min in humidified  
589 atmosphere comprising 5% CO<sub>2</sub> (CO<sub>2</sub> incubator). The mixtures were then transferred to Vero cells  
590 (ATCC CCL-81) and following incubation with cells for 90 min in the CO<sub>2</sub> incubator, the  
591 methylcellulose overlay was added. Three separate experiments each with duplicates were  
592 performed.

593 A cytopathic effect assay was performed with the SARS-CoV-2 DE-Gbg20 isolate and Vero cells  
594 (ATCC) plated at  $2 \times 10^4$  per well in 96-well plates the day prior to the experiment. Serial fivefold  
595 dilutions of pixatimod in DMEM supplemented with 2% heat-inactivated FCS, and 100 U of  
596 penicillin and 60  $\mu$ g/mL of streptomycin (DMEM-S) were incubated with 100 TCID<sub>50</sub> of SARS-  
597 CoV-2 isolate DE for 20 min in humidified atmosphere comprising 5% CO<sub>2</sub> (CO<sub>2</sub> incubator). The  
598 final concentrations of pixatimod were in a range 0.075  $\mu$ g/mL to 47.2  $\mu$ g/mL. The cells were  
599 rinsed once with 50  $\mu$ L of DMEM-S, and then 200  $\mu$ L of the virus-pixatimod mixtures were added  
700 to each well with cells (in quadruplicates). After incubation of the virus-pixatimod mixtures with  
701 cells for 3 days in the CO<sub>2</sub> incubator, the cells were inspected under a microscope for the presence  
702 of virus induced cytopathic effect where complete protection of cells were denoted as “+” while a

703 partial protection (~50% of cells showing no cytopathic effect) was recorded as “+/-“. The 50% end-  
704 point (EC<sub>50</sub>) was computed by the Reed and Muench method.

705  
706 SARS-CoV-2 QLD02 (GISAID accession EPI\_ISL\_407896) and QLD935 (GISAID accession  
707 EPI\_ISL\_436097) clinical isolates from Australia: A cytopathic effect assay was carried out as  
708 described above for the DE-Gbg20 isolate, with 10 ffu/well and 3 days incubation. In this assay,  
709 Vero E6 cells were plated at 2 x 10<sup>4</sup> per well in 96-well plates the day prior to experiment. Serial  
710 five-fold dilutions of pixatimod in DMEM supplemented with 2% heat-inactivated FCS, and 100  
711 U of penicillin and 60 µg/mL of streptomycin (DMEM-S) were incubated with 10 foci forming  
712 units of SARS-CoV-2 QLD02 or QLD935 isolate and incubated for 30 min in humidified  
713 atmosphere comprising 5% CO<sub>2</sub> (CO<sub>2</sub> incubator). The cells were rinsed once with 50 µL of DMEM-  
714 S, and then 200 µL of the virus-pixatimod mixtures were added to each well with cells (in  
715 triplicates). After incubation of the virus-pixatimod mixtures with cells for 3 days in the CO<sub>2</sub>  
716 incubator, the cells were fixed with 4% PFA and then stained with crystal violet. Then crystal violet  
717 was released by methanol and OD at 595nm was measured to quantify cell viability (protection  
718 from infection). The EC<sub>50</sub> was then calculated using GraphPad Prism.

719  
720 **Cytotoxicity assays:** The assay was performed as described previously (17). Briefly, Vero cells  
721 (ATCC, 2 x 10<sup>4</sup> cells/well) were seeded in 96 well cluster plates to become nearly confluent at the  
722 day of the experiment. The cell growth medium was then removed and 100 µL of serial fivefold  
723 dilutions of pixatimod in DMEM-S (ranging from 0.09 to 236 µg/mL) were added to cells.  
724 Following incubation of cells with pixatimod for 3 days in the CO<sub>2</sub> incubator, 20 µL of the MTS  
725 salt containing CellTiter 96 Aqueous One Solution reagent (Promega, Madison, WI) was added and  
726 incubated for further 1-2 h at 37 °C. The absorbance was recorded at 490 nm against a background  
727 of 650 nm. Two separate experiments each in duplicates were performed and the results are  
728 expressed as percentage of absorbance value detected with pixatimod relative to control cells.

729  
730 **Human bronchial cell infection assays:** The hTERT transformed bronchial epithelial cell line BCi-  
731 NS1.1 (23,24) expanded in PneumaCult-Ex Plus Basal Medium supplemented with Pneumacult Ex  
732 Plus supplements, hydrocortisone, nystatin and penicillin–streptomycin. BCi-NS1.1 cells were  
733 grown at an Air Liquid Interface (ALI) in PneumaCult-ALI Basal Medium supplemented with  
734 Pneumacult ALI supplement hydrocortisone, PneumaCult ALI maintenance supplement, heparin,  
735 nystatin and penicillin–streptomycin (all from Stemcell Technologies) at 37°C in 5% CO<sub>2</sub>. BCi-  
736 NS1.1 cell ciliation was observed by microscopy and cells were differentiated and ciliated after 4  
737 to 5 weeks at ALI. Transepithelial electrical resistance (TER) was monitored weekly using an  
738 EVOM Voltohmmeter (World Precision Instruments) and cells with a TER ≥1000 WΩm<sup>2</sup> were  
739 used.

740 SARS-CoV-2 strain BetaCoV/ Australia/VIC01/2020 was used for infection: 50,000 plaque-  
741 forming units (MOI=0.1-0.2, obtained from Public Health England and propagated in Vero E6 cells  
742 for no more than two passages before use) were preincubated with either 4, 40 and 400 µg/ml of  
743 Wockhardt heparin or 0.4, 4 and 40 µg/ml of pixatimod for 1 hr at 37°C in a total volume of 200  
744 µl (or an equivalent volume of saline was added apically in the untreated controls). BCi-NS1.1 cells  
745 (4 to 8 weeks after ALI) after being washed three times with HBSS were apically infected with the  
746 preincubated virus and compounds. After 2h the virus-compound solution was removed from the

747 apical side and washed twice each time with 200ul HBSS. The last wash was collected for plaque  
748 assays and 50 µl stored in Qiazol. Similarly at 72 h a further 200 µl HBSS wash was performed and  
749 collected as at 2h. Cells were also harvested with QIAzol (QIAGEN) at 2 h after the HBSS wash  
750 and at 72 h post-infection for RNA extraction.

751 Plaque assay was performed to quantify extracellular virus released in the supernatant of infected  
752 ALI. Vero E6 cells were seeded at  $2.5 \times 10^5$  cells/well in a 12-well plate and left for a period of 24  
753 hours in DMEM supplemented with 10% foetal bovine serum (FBS), glutamine and 50 U/ml  
754 penicillin-streptomycin at 37°C in 5% CO<sub>2</sub>. Cells were washed once with infection medium (serum-  
755 free DMEM supplemented with 25 mM HEPES) and 100 µl from washes of infected ALI cultures  
756 added to wells in 10 fold serial dilutions. After a 1 hour incubation at 37°C in 5% CO<sub>2</sub>, infectious  
757 supernatants were removed and a 1.5ml overlay of 1 x DMEM supplemented with 4% FBS, 25 mM  
758 HEPES and 0.6% (w/v) cellulose (Sigma; cat no 435244) was added. Plates were incubated at 37°C  
759 and 5% CO<sub>2</sub> for 72 hours before removing the overlay, fixing with 8% formaldehyde in PBS, and  
760 staining with 0.1% (w/v) crystal violet in a solution of 20% (v/v) ethanol.

761 RNA was isolated from cell lysates using standard phenol–chloroform extraction, and reverse  
762 transcribed to cDNA using a High Capacity cDNA Reverse Transcription kit (Thermo Fisher  
763 Scientific) following the manufacturer’s instructions. Taqman gene expression assays for N2 and  
764 N3 regions of the SARS-CoV-2 N gene were made (ThermoFisher) following CDC specifications  
765 (Division of Viral Diseases, National Center for Immunization and Respiratory Diseases, Centers  
766 for Disease Control and Prevention, Atlanta, GA, USA, 20 January 2020 copy).

767 To measure viral shedding in the apical side, gene expression was quantified using the  $2^{-\Delta Ct}$  method.  
768 For determination of relative changes of RNA within the cells the average Ct values of both SARS-  
769 CoV-2 N2 and N3 gene RNA were normalised against the house keeping gene B2M and shown as  
770 fold changes compared to the untreated cells using the  $2^{-\Delta\Delta Ct}$  method.

771  
772 **K18-hACE2 mouse experiments:** Mouse experiments are approved by the QIMR Berghofer MRI  
773 Biosafety Committee and Animal Ethics Committee (project P3600), and are conducted in  
774 accordance with the “Australian Code for the care and use of animals for scientific purposes” as  
775 defined by the National Health and Medical Research Council of Australia. Work was conducted  
776 in a dedicated suite in a biosafety level-3 (PC3) facility at the QIMR Berghofer MRI (Australian  
777 Department of Agriculture, Water and the Environment certification Q2326 and Office of the Gene  
778 Technology Regulator certification 3445). Heterozygous K18 hACE2-transgenic mice (The  
779 Jackson Laboratory, Bar Harbour, ME, USA) were bred in-house by crossing with C57BL/6J mice  
780 (Animal Resources Center, Canning Vale, WA, Australia). DNA from tail tips was isolated using  
781 Extract-N-Amp Tissue PCR kit (Sigma) and PCR genotyping undertaken as described (The Jackson  
782 Laboratory. Genotyping protocols database. B6.Cg-Tg(K18-ACE2)2PrImn/J. Stock No: 034860.  
783 Protocol 38276), except using primers Forward – 5'-CTTGGTGATATGTGGGGTAGA-3',  
784 reverse 5' CGCTTCATCTCCCACCACTT-3' (recommended by NIOBIOHN, Osaka, Japan).

785  
786 Female 6-8 week old K18 hACE2 mice (n=4 per group) were treated once with 16 mg/kg of  
787 pixatimod in 200 µl saline i.p. on the day before infection. Control K18 hACE2 mice received 200  
788 µl saline on the day before infection. Age and gender matched C57BL/6J mice (n=4) were included  
789 as a drug toxicity control and received 16 mg/kg of pixatimod in 200 µl saline i.p., but were not  
790 infected with virus.

791 hCoV-19/Australia/QLD02/2020 (QLD02) (GISAID Accession ID; EPI\_ISL\_407896) virus was  
792 used to inoculate K18 hACE2 mice (n=4 per group) intranasally with  $10^4$  CCID<sub>50</sub> of virus in 50  $\mu$ l  
793 medium while under light anaesthesia; 3% isoflurane (Piramal Enterprises Ltd., Andhra Pradesh,  
794 India) delivered using The Stinger, Rodent Anesthesia System (Advanced Anaesthesia  
795 Specialists/Darvall, Gladesville, NSW, Australia). Mice were weighed daily and euthanized on day  
796 5 post-infection using CO<sub>2</sub>. Tissues were fixed for histology or were weighed and then  
797 homogenised using four ceramic beads at 6000 rpm twice for 15 s (Precellys 24 Homogeniser,  
798 Bertin Instruments, Montigny-le-Bretonneux, France). After centrifugation for 30 mins, 2000 g at  
799 4°C, virus titres in supernatants were determined by CCID<sub>50</sub> assays using Vero E6 cells.

300 **Statistical analysis:** Experimental data are presented as means  $\pm$  SD, SEM or CV as noted.  
301 Statistical analyses were performed using analysis of a two-tailed Student's *t* test with GraphPad  
302 Prism (GraphPad Software) unless otherwise noted. Differences were considered statistically  
303 significant if the *P* value was less than 0.05. Statistical analysis for the K18-hACE2 mouse work  
304 was performed using IBM SPSS Statistics for Windows, Version 19.0 (IBM Corp., Armonk, NY,  
305 USA). The t-test was used when the data was deemed parametric, i.e. difference in variances was  
306 <4, skewness was >2 and kurtosis was <2. Otherwise the non-parametric Kolmogorov-Smirnov  
307 test was used.

## 308 309 **References**

- 310
- 311 1. Akhmerov, A., and Marbán, E. COVID-19 and the Heart. *Circ Res* 126, 1443-1455. (2020)
- 312 2. Cagno, V., Tseligka, E.D., Jones, S.T., and Tapparel, C. Heparan Sulfate Proteoglycans and  
313 Viral Attachment: True Receptors or Adaptation Bias? *Viruses* 11, 596.(2019)
- 314 3. Milewska, A., Zarebski, M., Nowak, P., Stozek, K., Potempa, J., and Pyrc, K. Human coronavirus  
315 NL63 utilizes heparan sulfate proteoglycans for attachment to target cells. *J Virol* 88,  
316 13221-13230.(2014)
- 317 4. Vicenzi, E., Canducci, F., Pinna, D., Mancini, N., Carletti, S., Lazzarin, A., Bordignon, C., Poli,  
318 G., and Clementi, M. Coronaviridae and SARS-associated coronavirus strain HSR1. *Emerg*  
319 *Infect Dis* 10, 413-418.(2004)
- 320 5. Hoffmann, M., Kleine-Weber, H., Schroeder, S., Krüger, N., Herrler, T., Erichsen, S.,  
321 Schiergens, T.S., Herrler, G., Wu, N.H., Nitsche, A., Müller, M.A., Drosten, C., and  
322 Pöhlmann, S. SARS-CoV-2 Cell Entry Depends on ACE2 and TMPRSS2 and Is Blocked  
323 by a Clinically Proven Protease Inhibitor. *Cell* 181, 271-280.e278.(2020)
- 324 6. Mycroft-West, C., Su, D., Elli, S., Guimond, S., Miller, G., Turnbull, J., Yates, E., Guerrini, M.,  
325 Fernig, D., Lima, M., and Skidmore, M. The 2019 coronavirus (SARS-CoV-2) surface  
326 protein (Spike) S1 Receptor Binding Domain undergoes conformational change upon  
327 heparin binding. *bioRxiv*, 2020.2002.2029.971093.(2020a)
- 328 7. Mycroft-West, C.J., Su, D., Li, Y., Guimond, S.E., Rudd, T.R., Elli, S., Miller, G., Nunes, Q.M.,  
329 Procter, P., Bisio, A., Forsyth, N.R., Turnbull, J.E., Guerrini, M., Fernig, D.G., Yates, E.A.,  
330 Lima, M.A., and Skidmore, M.A. SARS-CoV-2 Spike S1 Receptor Binding Domain  
331 undergoes Conformational Change upon Interaction with Low Molecular Weight Heparins.  
332 *bioRxiv*, 2020.2004.2029.068486. (2020b)
- 333 8. Mycroft-West, C.J., Su, D., Pagani, I., Rudd, T.R., Elli, S., Guimond, S.E., Miller, G.,  
334 Meneghetti, M.C.Z., Nader, H.B., Li, Y., Nunes, Q.M., Procter, P., Mancini, N., Clementi,  
335 M., Forsyth, N.R., Turnbull, J.E., Guerrini, M., Fernig, D.G., Vicenzi, E., Yates, E.A., Lima,  
336 M.A., and Skidmore, M.A. Heparin inhibits cellular invasion by SARS-CoV-2: structural

- 337 dependence of the interaction of the surface protein (spike) S1 receptor binding domain with  
338 heparin. *Thrombosis and Haemostasis*. 120 (12):1700–1715 (2020c)
- 339 9. Liu, L., Chopra, P., Li, X., Wolfert, M.A., Tompkins, S.M., and Boons, G.J. SARS-CoV-2  
340 spike protein binds heparan sulfate in a length- and sequence-dependent manner. *bioRxiv*.  
341 doi.org/10.1101/2020.05.10.087288 (2020)
- 342 10. Clausen, T.M., Sandoval, D.R., Spliid, C.B., Pihl, J., Painter, C.D., Thacker, B.E., .....Esko,  
343 J.D. SARS-CoV-2 Infection Depends on Cellular Heparan Sulfate and ACE2. *Cell*,  
344 doi.org/10.1016/j.cell.2020.09.033 (2020)
- 345 11. Vilanova, E., Tovar, A.M.F., and Mourão, P.a.S. Imminent risk of a global shortage of heparin  
346 caused by the African Swine Fever afflicting the Chinese pig herd. *J Thromb Haemost* 17,  
347 254-256.(2019)
- 348 12. Ferro, V., Liu, L., Johnstone, K.D., Wimmer, N., Karoli, T., Handley, P., Rowley, J., Dredge,  
349 K., Li, C.P., Hammond, E., Davis, K., Sarimaa, L., Harenberg, J., and Bytheway, I.  
350 Discovery of PG545: a highly potent and simultaneous inhibitor of angiogenesis, tumor  
351 growth, and metastasis. *J Med Chem* 55, 3804-3813.(2012)
- 352 13. Dredge, K., Brennan, T.V., Hammond, E., Lickliter, J.D., Lin, L., Bampton, D., Handley, P.,  
353 Lankesheer, F., Morrish, G., Yang, Y., Brown, M.P., and Millward, M. A Phase I study of  
354 the novel immunomodulatory agent PG545 (pixatimod) in subjects with advanced solid  
355 tumours. *Br J Cancer* 118, 1035-1041. (2018)
- 356 14. Khamaysi, I., Singh, P., Nasser, S., Awad, H., Chowers, Y., Sabo, E., Hammond, E., Gralnek,  
357 I., Minkov, I., Nosedá, A., Ilan, N., Vlodavsky, I., and Abassi, Z. The Role of Heparanase  
358 in the Pathogenesis of Acute Pancreatitis: A Potential Therapeutic Target. *Sci Rep* 7, 715.  
359 (2017)
- 360 15. Said, J.S., Trybala, E., Görander, S., Ekblad, M., Liljeqvist, J., Jennische, E., Lange, S., and  
361 Bergström, T. The Cholesterol-Conjugated Sulfated Oligosaccharide PG545 Disrupts the  
362 Lipid Envelope of Herpes Simplex Virus Particles. *Antimicrob Agents Chemother* 60, 1049-  
363 1057.(2016)
- 364 16. Said, J., Trybala, E., Andersson, E., Johnstone, K., Liu, L., Wimmer, N., Ferro, V., and  
365 Bergström, T. Lipophile-conjugated sulfated oligosaccharides as novel microbicides against  
366 HIV-1. *Antiviral Res* 86, 286-295.(2010)
- 367 17. Lundin, A., Bergström, T., Andrighetti-Fröhner, C.R., Bendrioua, L., Ferro, V., and Trybala, E.  
368 Potent anti-respiratory syncytial virus activity of a cholesterol-sulfated tetrasaccharide  
369 conjugate. *Antiviral Res* 93, 101-109.(2012)
- 370 18. Supramaniam, A., Liu, X., Ferro, V., and Herrero, L.J. Prophylactic Antiheparanase Activity  
371 by PG545 Is Antiviral In Vitro and Protects against Ross River Virus Disease in Mice.  
372 *Antimicrob Agents Chemother* 62(4): e.01959-17 (2018)
- 373 19. Modhiran, N., Gandhi, N.S., Wimmer, N., Cheung, S., Stacey, K., Young, P.R., Ferro, V., and  
374 Watterson, D. Dual targeting of dengue virus virions and NS1 protein with the heparan  
375 sulfate mimic PG545. *Antiviral Res* 168, 121-127.(2019)
- 376 20. Uniewicz, K.A., Orio, A., Xu, R., Ahmed, Y., Wilkinson, M., Fernig, G. D and Yates. A. E.  
377 Differential Scanning Fluorimetry Measurements of Protein Stability Changes upon  
378 Binding to Glycosaminoglycans: A Screening Test for Binding Specificity. *Anal. Chem.*  
379 82(9), 3796-3802 (2010)
- 380 21. Tree, J.A., Turnbull, J.E., Buttigieg, K.R., Elmore, M.J., Coombes, N., Hogwood, J., Yates,  
381 E.A., Gray, E., Singh, D., Wilkinson, T., Page, C.P., Carroll, M.W. Unfractionated heparin  
382 inhibits live wild-type SARS-CoV-2 cell infectivity at therapeutically relevant  
383 concentrations. *British J Pharmacol* 178, 626-635 (2021)
- 384 22. Korber, B., Fischer, W.M., Gnanakaran, S., Yoon, H., Theiler, J., Abfalterer, W., Hengartner,  
385 N., Giorgi, E.E., Bhattacharya, T., Foley, B., Hastie, K.M., Parker, M.D., Partridge, D.G.,  
386 Evans, C.M., Freeman, T.M., de Silva, T.I., Sheffield COVID-19 Genomics

- 387 Group., McDanal, C., Perez, L.G., Tang, H., Moon-Walker, A., Whelan, SP., LaBranche,  
388 CC., Saphire, EO. and Montefiori, D.C., Tracking Changes in SARS-CoV-2 Spike:  
389 Evidence that D614G Increases Infectivity of the COVID-19 Virus. *Cell*. 182: 812–827.e19.  
390 (2020)
- 391 23. Blume C, Jackson CL, Spalluto CM, Legebeke J, Nazlamova L, Conforti F, et al. A novel  
392 ACE2 isoform is expressed in human respiratory epithelia and is upregulated in response  
393 to interferons and RNA respiratory virus infection. *Nat Genet*. 2021.
- 394 24. Walters MS, Gomi K, Ashbridge B, Moore MA, Arbelaez V, Heldrich J, et al. Generation of a  
395 human airway epithelium derived basal cell line with multipotent differentiation capacity.  
396 *Respir Res*. 2013;14(1):135.
- 397 25. Rosenfeld, R. Post-exposure protection of SARS-CoV-2 lethal infected K18-hACE2  
398 transgenic mice by neutralizing human monoclonal antibody.  
399 <https://doi.org/10.1101/2020.10.26.354811>; (2020).
- 390 26. Moreau, G. B. et al. Evaluation of K18-hACE2 Mice as a Model of SARS-CoV-2 Infection.  
391 *Am J Trop Med Hyg* **103**, 1215-1219 (2020).
- 392 27. Emma S. Winkler, Adam L. Bailey, Natasha M. Kafai, Sharmila Nair, Broc T. McCune,  
393 Jinsheng Yu, Julie M. Fox, Rita E. Chen, James T. Earnest, Shamus P. Keeler, Jon H. Ritter,  
394 Liang-I Kang, Sarah Dort, Annette Robichaud, Richard Head, Michael J. Holtzman and  
395 Michael S. Diamond. SARS-CoV-2 infection of human ACE2-transgenic mice causes  
396 severe lung inflammation and impaired function. *Nature Immunol*. 21, 1327-1335. (2020)
- 397 28. Claude Kwe Yinda, Julia R. Port, Trenton Bushmaker, Irene Offei Owusu, Jyothi N.  
398 Purushotham, Victoria A. Avanzato, Robert J. Fischer, Jonathan E. Schulz, Myndi G.  
399 Holbrook, Madison J. Hebner, Rebecca Rosenke, Tina Thomas, Andrea Marzi, Sonja M.  
390 Best, Emmie de Wit, Carl Shaia, Neeltje van Doremalen, Vincent J. Munster. K18-hACE2  
391 mice develop respiratory disease resembling severe COVID-19. *PLoS Pathogens*.  
392 [doi.org/10.1371/journal.ppat.1009195](https://doi.org/10.1371/journal.ppat.1009195) (2021)
- 393 29. Lindahl, U., and Li, J.P. Heparin - an old drug with multiple potential targets in Covid-19  
394 therapy. *J Thromb Haemost*.(2020)
- 395 30. Yang, Y., Du, Y., and Igor A. Kaltashov, I.A. The utility of native MS for understanding the  
396 mechanism of action of repurposed therapeutics in COVID-19: heparin as a disruptor of the  
397 SARS-CoV-2 interaction with its host cell receptor. *BioRxiv*,  
398 [doi.org/10.1101/2020.06.09.142794](https://doi.org/10.1101/2020.06.09.142794) (2020)
- 399 31. Partridge, L.J., Green, L.R., Monk, P.N. Unfractionated heparin potently inhibits the binding of  
390 SARS-CoV-2 spike protein to a human cell line. *bioRxiv*, 2020.05.21.107870 (2020)
- 391 32. Tandon, R., Sharp, J.S., Zhang, F., Pomin, V.H., Ashpole, N.M., Mitra, D., Jin, W., Liu, H.,  
392 Sharma, P., and Linhardt, R.J. Effective Inhibition of SARS-CoV-2 Entry by Heparin and  
393 Enoxaparin Derivatives. *bioRxiv*, 2020.06.08.140236 (2020)
- 394 33. Bargellini, I., Cervelli, R., Lunardi, A., Scandiffio, R., Daviddi, F., Giorgi, L., Cicorelli, A.,  
395 Crocetti, L., and Cioni, R. Spontaneous Bleedings in COVID-19 Patients: An Emerging  
396 Complication. *Cardiovasc Intervent Radiol*, 1-2. (2020)
- 397 34. Dredge, K., Hammond, E., Handley, P., Gonda, T.J., Smith, M.T., Vincent, C., Brandt, R.,  
398 Ferro, V., and Bytheway, I. PG545, a dual heparanase and angiogenesis inhibitor, induces  
399 potent anti-tumour and anti-metastatic efficacy in preclinical models. *Br J Cancer* 104, 635-  
390 642.(2011)
- 391 35. Boyango, I., Barash, U., Naroditsky, I., Li, J.P., Hammond, E., Ilan, N., and Vlodaysky, I.  
392 Heparanase cooperates with Ras to drive breast and skin tumorigenesis. *Cancer Res* 74,  
393 4504-4514.( 2014)
- 394 36. Dixon, B. et al Nebulised heparin for patients with or at risk of acute respiratory distress  
395 syndrome: a multicentre, randomised, double-blind, placebo-controlled phase 3 trial. *Lancet*  
396 *Resp. Med*. 10.1016/S2213-2600(20)30470-7 (2021)



37. Machhi, J. et al. The Natural History, Pathobiology, and Clinical Manifestations of SARS-CoV-2 Infections. *J Neuroimmune Pharmacol* **15**, 359-386 (2020).
38. Ylikoski, J., Markkanen, M. & Mäkitie, A. Pathophysiology of the COVID-19 - entry to the CNS through the nose. *Acta Otolaryngol* **140**, 886-889 (2020).
39. Koenig, P-A. et al. Structure-guided multivalent nanobodies block SARS-CoV-2 infection and suppress mutational escape. *Science* **371**, 6530 (2021).
40. Merad, M., and Martin, J.C. Pathological inflammation in patients with COVID-19: a key role for monocytes and macrophages. *Nat Rev Immunol* **20**, 355-362.(2020)
41. Khanna, M., Ranasinghe, C., Browne, A.M., Li, J.P., Vlodaysky, I., and Parish, C.R. Is host heparanase required for the rapid spread of heparan sulfate binding viruses? *Virology* **529**, 1-6.(2019)
42. Buijssers, B., Yanginlar, C., de Nooijer, A., Grondman, I., Maciej-Hulme, M.L., Jonkman, I., Janssen, N.A.F., Rother, N., de Graaf, M., Pickkers, P., Kox, M., Joosten, L.A.B., Nijenhuis, T., Netea, M.G., Hilbrands, L., van de Veerdonk, F.L., Duivenvoorden, R., de Mast, Q & van der Vlag J. Increased plasma heparanase activity in COVID-19 patients. *Front. Immunol.* [doi.org/10.3389/fimmu.2020.57047](https://doi.org/10.3389/fimmu.2020.57047) (2020)
43. Ghanakota, P., and Carlson, H.A. Moving Beyond Active-Site Detection: MixMD Applied to Allosteric Systems. *J Phys Chem B* **120**, 8685-8695.(2016)
44. Salomon-Ferrer, R., Götz, A.W., Poole, D., Le Grand, S., and Walker, R.C. Routine Microsecond Molecular Dynamics Simulations with AMBER on GPUs. 2. Explicit Solvent Particle Mesh Ewald. *Journal of Chemical Theory and Computation* **9**, 3878-3888. (2013).
45. Case, D.A., Cheatham Iii, T.E., Darden, T., Gohlke, H., Luo, R., Merz Jr, K.M., Onufriev, A., Simmerling, C., Wang, B., and Woods, R.J. The Amber biomolecular simulation programs. *Journal of computational chemistry* **26**, 1668-1688. (2005).
46. Jorgensen, W.L., Chandrasekhar, J., Madura, J.D., Impey, R.W., and Klein, M.L. Comparison of simple potential functions for simulating liquid water. *The Journal of Chemical Physics* **79**, 926-935. (1983).
47. Lindorff-Larsen, K., Piana, S., Palmo, K., Maragakis, P., Klepeis, J.L., Dror, R.O., and Shaw, D.E. Improved side-chain torsion potentials for the Amber ff99SB protein force field. *Proteins* **78**, 1950-1958. (2010).
48. Kirschner, K.N., Yongye, A.B., Tschampel, S.M., González-Outeiriño, J., Daniels, C.R., Foley, B.L., and Woods, R.J. GLYCAM06: a generalizable biomolecular force field. Carbohydrates. *J Comput Chem* **29**, 622-655. (2008).
49. Madej, B.D., Gould, I.R., and Walker, R.C. A Parameterization of Cholesterol for Mixed Lipid Bilayer Simulation within the Amber Lipid14 Force Field. *J Phys Chem B* **119**, 12424-12435. (2015).
50. Gohlke, H., Kiel, C., and Case, D.A. Insights into protein-protein binding by binding free energy calculation and free energy decomposition for the Ras-Raf and Ras-RalGDS complexes. *J Mol Biol* **330**, 891-913. (2003).
51. Genheden, S., and Ryde, U. The MM/PBSA and MM/GBSA methods to estimate ligand-binding affinities. *Expert Opin Drug Discov* **10**, 449-461. (2015).
52. Onufriev, A., Bashford, D., and Case, D.A. Exploring protein native states and large-scale conformational changes with a modified generalized born model. *Proteins* **55**, 383-394. (2004).
53. Micsonai, A., Wien, F., Kernya, L., Lee, Y.H., Goto, Y., Réfrégiers, M., and Kardos, J. Accurate secondary structure prediction and fold recognition for circular dichroism spectroscopy. *Proc Natl Acad Sci U S A* **112**, E3095-3103.(2015)

385

086 **Acknowledgments:** The authors would like to thank Zucero Therapeutics for provision of  
087 pixatimod (PG545) and Queensland Health Forensic & Scientific Services, Queensland Department  
088 of Health for provision of QLD02 and QLD935 SARS-CoV-2 isolates.

089  
090 **Funding:** V.F. acknowledges support from the Australian Research Council (DP170104431). TB  
091 acknowledges support of the Swedish Research Council. AAK and AS acknowledge funding  
092 support from the Australian Infectious Diseases Research Centre. Computational (and/or data  
093 visualization) resources and services used in this work were provided by the eResearch Office,  
094 Queensland University of Technology, Brisbane, Australia and with the assistance of resources  
095 from the National Computational Infrastructure (NCI Australia), an NCRIS enabled capability  
096 supported by the Australian Government. N.S.G. is supported through the Advance Queensland  
097 Industry Research Fellowship. AS is supported by an Investigator grant from the National Health  
098 and Medical Research Council of Australia, and acknowledges philanthropic support from *inter*  
099 *alia* Clive Berghofer and Lyn Brazil, as well as contract R&D funding from Zucero. M.A.S., S.E.G.  
100 and C.M-W. acknowledge support of the University of Keele and J.E.T. and E.A.Y. the support of  
101 the University of Liverpool and contract R&D funding from Zucero. Z.Y. acknowledges the Danish  
102 National Research Foundation (DNRF107) and the Lundbeck Foundation, Y-H.C. the Innovation  
103 Fund Denmark and R.K. the European Commission (GlycoImaging H2020-MSCA-ITN-721297).

104  
105 **Author contributions:** J.E.T., V.F., M.A.S. and K.D. conceived the project. S.E.G., C.J.M-W.,  
106 N.S.G., J.A.T., T.T.L., C.M.S., M.V.H., K.R.B., N.C., M.J.E., K.N., J.S., Y.X.S., A.A.A., N.M.,  
107 J.D.J.S., M.C., D.W., P.R.Y., A.A.K., M.A.L., E.A.Y., R.K., R.L.M., Y-H.C., Z.Y., E.T., M.A.S.,  
108 T.M.A.W. and A.S. designed and conducted the experiments and undertook analyses. V.F., E.H.,  
109 K.D. M.W.C., J.S., T.B., M.A.S. and J.E.T. analyzed results and prepared the manuscript.

110  
111  
112 **Competing Interests:** E.H. and K.D. are employees of Zucero Therapeutics. V.F., E.H. and K.D.  
113 are inventors on pixatimod patents.

114 **Data and materials availability:** All data needed to evaluate the conclusions in the paper are  
115 present in the paper and/or the Supplementary Materials. Additional data related to this paper may  
116 be requested from the authors.

034  
035  
036  
037  
038  
039  
040  
041  
042  
043  
044  
045  
  
046  
  
047  
  
048  
049  
050  
051  
052  
053  
054  
055  
  
056  
057  
058  
059  
060  
061  
062  
063  
064  
065  
066

## Supplementary Materials

### The clinical-stage heparan sulfate mimetic pixatimod (PG545) potently inhibits SARS-CoV-2 virus via disruption of the Spike-ACE2 interaction

Scott E. Guimond, Courtney J. Mycroft-West, Neha S. Gandhi, Julia A. Tree, Karen R. Buttigieg, Naomi Coombes, Kristina Nyström, Joanna Said, Yin Xiang Setoh, Alberto A. Amarilla, Naphak Modhiran, De Jun Julian Sng, Mohit Chhabra, Daniel Watterson, Paul R. Young, Alexander A. Khromykh, Marcelo A. Lima, Edwin A. Yates, Richard Karlsson, Yen-Hsi Chen, Yang Zhang, Edward Hammond, Keith Dredge, Miles W. Carroll, Edward Trybala, Tomas Bergström, Vito Ferro, Mark A. Skidmore and Jeremy E. Turnbull

#### The file includes:

Table S1  
Figs. S1 to S4

**Table S1: Amino acids at position 614 in Spike protein of SARS-CoV-2 isolates**

| Isolate  | Amino acids at position 614 in Spike |
|----------|--------------------------------------|
| VIC01    | D                                    |
| QLD02    | D                                    |
| QLD935   | G                                    |
| DE-Gbg20 | G                                    |

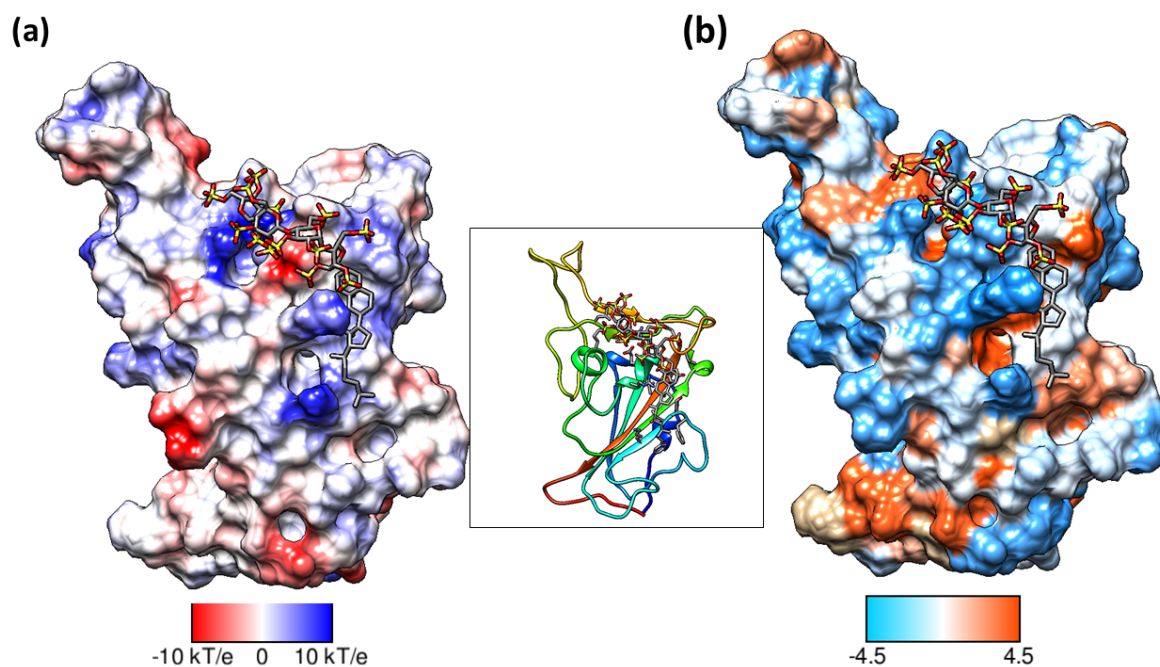

067  
068  
069 **Figure S1. An alternate binding mode of pixatimod on the S1 RBD presented an unfavourable**  
070 **total binding free energy.** Surfaces are oriented in the same direction as shown in the ribbon  
071 diagram in the inset. (a) Coulombic Surface Coloring defaults:  $\epsilon = 4r$ , thresholds  $\pm 10$  kcal/mol  $\cdot$  e  
072 were used. Blue indicates surface with basic region whereas red indicates negatively charged  
073 surface. (b) The hydrophobic surface was coloured using the Kyte-Doolittle scale wherein blue,  
074 white and orange red colour indicates most hydrophilic, neutral and hydrophobic region,  
075 respectively. UCSF Chimera was used for creating surfaces and rendering the images. Hydrogens  
076 are not shown for clarity.  
077  
078  
079  
080  
081  
082

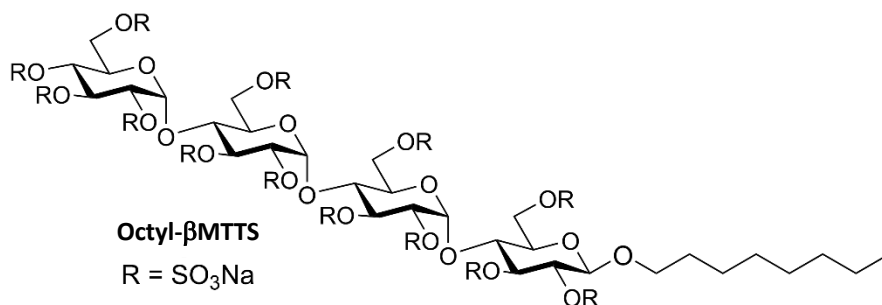

083  
084  
085 **Figure S2. Structure of octyl  $\beta$ -maltotetraoside tridecasulfate, an analogue of pixatimod without**  
086 **the steroid side chain.**  
087  
088  
089  
090  
091  
092  
093  
094

095  
096  
097

**A**

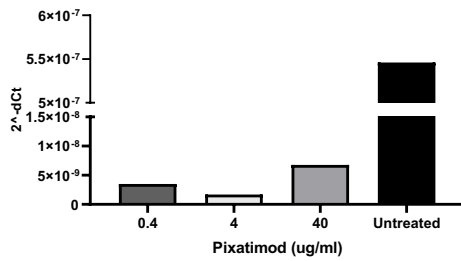

098  
099  
100

**B**

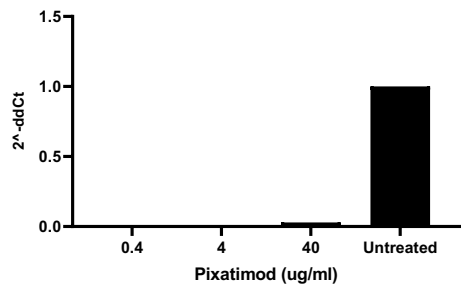

101  
102  
103  
104  
105  
106  
107  
108  
109  
110  
111

**Figure S3: Pixatimod inhibits infection of human bronchial epithelial cells with SARS-CoV-2 virus.** Live virus infectivity assays of bronchial airway epithelial cells BCI-NS1.1, grown in an air liquid interface (ALI), were performed as described in Methods for the SARS-CoV-2 isolate VIC01. Viral shedding in the apical side (panel A) and viral load in infected cells (panel B) was measured by RT-PCR of viral RNA, as described in Methods. (representative data shown).

**A**

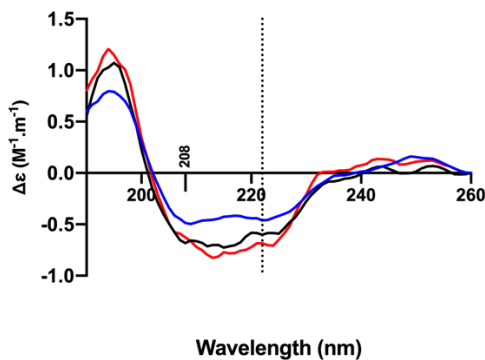

**B**

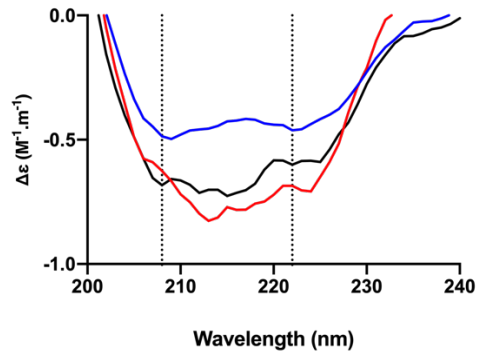

112  
113  
114  
115  
116  
117  
118  
119

**Figure S4: The conformational change of the SARS-CoV-2 S1 RBD observed in the presence of pixatimod by circular dichroism (CD) spectroscopy.** (A). Circular dichroism spectra (190 - 260 nm) of SARS-CoV-2 S1 RBD alone (black solid line) and pixatimod (blue solid line) in PBS, pH 7.4. The red line represents the sum of the two individual spectra. Vertical dotted line indicates 222 nm (B) Details of the same spectra expanded between 200 and 240 nm. Vertical dotted lines indicate 222 nm and 208 nm.
